## **Use of unmanned aerial vehicles (UAVs) for mark-resight nesting population estimation of adult female green sea turtles at Raine Island**

\*Andrew Dunstan<sup>1</sup>, Katherine Robertson<sup>1</sup>, Richard Fitzpatrick<sup>2</sup>, Jeff Pickford<sup>3</sup> and Justin Meager<sup>1</sup>

<sup>1</sup>Queensland Department of Environment and Science, PO Box 2454, Brisbane, Qld 4000, Australia

<sup>2</sup>Biopixel Oceans Foundation, James Cook University, 14-88 McGregor Road, Smithfield 4878, Qld 4878, Australia

<sup>3</sup>Queensland Department of Natural Resources Mines and Energy, 275 George St, Brisbane, Qld 4000, Australia

\*Corresponding author

E-mail: [andrew.dunstan@des.qld.gov.au](mailto:andrew.dunstan@des.qld.gov.au) (AJD)

## 1 **Abstract**

2 Nester abundance is a key measure of the performance of the world's largest green  
3 turtle rookery at Raine Island, Australia. Abundance surveys have been undertaken in waters  
4 adjacent to Raine Island reef using mark-resight counts by surface observer (SO), underwater  
5 video (UWV) and unmanned aerial vehicle (UAV) (since 1984, 2013 and 2016 respectively).  
6 UAV and UWV may provide more cost-effective and less biased alternatives, but estimates  
7 must be comparable with the historical estimates. Here we compare the three methods.

8 The relative likelihood of resighting a marked turtle was significantly higher by SO  
9 than the other methods, which led to lower mark-resight population estimates than by UAV  
10 or UWV. Most (96%) variation in resighting probabilities was associated with survey period,  
11 with comparatively little variation between consecutive days of sampling or time of day. This  
12 resulted in preliminary correction factors of 1.53 and 1.73 from SO-UWV and SO-UAV,  
13 respectively. However, the SO and UWV estimates were the most similar when turtle  
14 densities were the lowest, suggesting that correction factors need to take into account turtle  
15 density and that more data are required.

16 We hypothesise that the UAV and UWV methods improved detection rates of marked  
17 turtles because they allowed subsequent review and frame-by-frame analysis, thus reducing  
18 observer search error. UAVs were the most efficient in terms of survey time, personnel  
19 commitment and weather tolerance compared to the SO and UWV methods.

20 This study indicates that using UAVs for in-water mark-resight turtle abundance  
21 estimation is an efficient and accurate method that can provide an accurate adjustment for  
22 historical abundance estimates. Underwater video may continue to be useful as a backup  
23 alternative to UAV surveys.

24

## 25 Introduction

26 Green turtles, *Chelonia mydas*, are listed as vulnerable in the State of Queensland  
27 (Nature Conservation Act 1992) and in Australia (Environment Protection and Biodiversity  
28 Conservation Act 1999). The majority of the northern Great Barrier Reef (nGBR) population  
29 of green turtles nest at Raine Island (Fig 1), which is the world's largest remaining green  
30 turtle rookery (Seminoff et al 2015). Concerns about low reproductive success of green  
31 turtles at Raine Island have been reported since 1996 (Limpus et al 2003; Dunstan et al  
32 2018), which is thought to be caused by nesting beach inundation as well as nest environment  
33 factors such as respiratory gas, microbial or temperature extremes (Dunstan et al 2018). The  
34 population is also exposed to other cumulative impacts including climate change (Fuentes et  
35 al 2011), feminisation (Jensen et al 2018), hunting (Grayson et al 2010), plastic pollution  
36 (Schuyler et al 2014), vessel strikes (Hazel et al 2006), commercial fishing (Wilcox et al  
37 2015) and coastal development (Bell et al 2019). An accurate index of nesting population  
38 numbers is critical for understanding the reproductive success and long-term changes to  
39 population numbers.

40

41

42 **Fig 1. Raine Island location.** (a) Location of Raine Island on the northern Great Barrier  
43 Reef, Australia, (b) Raine Island reef study site and (c) transect search paths with turtle  
44 detectability experimental sample sites marked.

45 The remoteness of Raine Island and the sheer number of nesters on a given night have  
46 precluded total nesting censuses or a comprehensive mark recapture program. Instead, a

47 mark-resight approach has been used to estimate the numbers of nesters in the surrounding  
48 inter-nesting habitat since 1984 (Limpus et al 2003). Females are painted (marked) during  
49 nightly tally counts, and counts of marked and unmarked turtles in the waters that surround  
50 Raine Island are used to estimate abundance during the sampling period using the Lincoln-  
51 Petersen estimator (LP). Mark-resight is therefore combined with in-water sampling, and thus  
52 estimations of nester abundance are dependent on the limitations and assumptions of both  
53 approaches.

54         The major challenge for in-water surveys is to have high detectability for both marked  
55 and unmarked turtles, given that marine turtles spend only a small proportion of their time at  
56 the water surface, especially when surface conditions are poor, in turbid water or when turtles  
57 are amongst habitat structure (Fuentes et al 2015). The LP estimator is based on the  
58 assumption that the population is ‘closed’ during the sampling period (Williams et al 2002),  
59 which means that they do not depart from inter-nesting habitat in the short time interval from  
60 marking to the in-water survey. Another key assumption of the LP estimator is that the  
61 probability of detection is the same between marked and unmarked turtles. The LP estimator  
62 is also only based on one resighting event, which could make it less robust than estimates  
63 from repeated sampling.

64 The introduction of modern technologies such as UAVs and underwater video for counting  
65 surveys coupled with artificial intelligence for automated image analysis may provide a more  
66 time efficient and reliable mark-resight estimate. Another advantage of UAVs and  
67 underwater cameras compared to the vessel platform is that effect of surface reflections can  
68 be suppressed or eliminated. Here we aimed to compare the effectiveness of the vessel  
69 observers, UAVs and underwater video, and to determine if the UAV and underwater camera  
70 estimates are comparable to the historical data. Our comparison of detectability of marked  
71 turtles between methods also provided the opportunity to test the key LP estimator

72 assumption of equal detectability of marked and unmarked turtles. If the probability of  
73 detection is the same between marked and unmarked turtles, the ratio of marked and  
74 unmarked turtles should not differ between sampling methods. Finally, we used a repeated  
75 sampling study design to (a) determine whether there is a gain in precision in the LP  
76 estimator with repeated sampling, and (b) test whether the closure assumption was  
77 appropriate.

## 78 **Materials and methods**

### 79 **Ethics statement**

80 All procedures used in this project were approved by the Raine Island Scientific  
81 Advisory Group and by the Queensland Department of Agriculture and Forestry Animal  
82 Ethics Committee (Permits SA 2015/12/533 and SA 2018/11/660).

### 83 **Study area**

84 Raine Island is located on the outer edge of the northern Great Barrier Reef and is part  
85 of the Raine Island National Park (Scientific). The Wuthathi People and Kemerker  
86 Meriam Nation (Ugar, Mer, Erub) People are the Traditional Owners and Native Title holders  
87 for this country and are an integral partner of the area's management. Over thousands of  
88 years, Wuthathi People and Kemerker Meriam Nation People have held cultural  
89 connections to Raine Island through the use of its resources and cultural connections to the  
90 land and sea, through song lines, stories, and voyages to the island.

91 All research was undertaken on the reef waters adjacent to the Raine Island National  
92 Park (Scientific) (11° 35' 25" S, 144° 02' 05" E) between November and February during the  
93 2013-14 to 2017-18 green turtle nesting seasons (Fig 1). Raine Island reef has a perimeter of

94 approximately 6.5 km and is fringed by coral reefs. Green turtles are the only sea turtle  
95 species recorded nesting at Raine Island where the nesting beach is approximately 80 m wide  
96 with a circumference of 1.8 km. Nesting is seasonal with the main nesting period from  
97 October to April and extremely low rates of nesting for the rest of the year (Limpus 2007).  
98 The peak nesting period is from December to January.

99 As many as 23,000 turtles have been counted in one night at the beach. However,  
100 there is a large variability in green turtle nesting numbers from year-to-year that is correlated  
101 with the lagged Southern Oscillation Index (Limpus and Nichols, 2000).

## 102 **Turtle marking procedure**

103 The carapaces of nesting turtles were painted along the midline with a white stripe  
104 approximately 80 cm in length and 20 cm in width, using a 12 cm wide paint roller and  
105 “APCO-SDS fast dry water-based road marking paint” (MSDS Infosafe No. 1WDKY)  
106 (Dunstan, 2018). A turtle was selected for painting if the carapace was dry, the carapace did  
107 not have a thick coating of algae and the turtle was inland of the beach crest (to provide  
108 sufficient time for the paint to dry). When applied under these conditions, the paint adhered  
109 to the carapace surface for at least 96 hr. This was confirmed over the three nights following  
110 painting of turtles, which provided the opportunity to assess the paint when many painted  
111 turtles came ashore to re-attempt nesting. While there was erosion of paint on a small  
112 proportion of turtles, enough paint always remained to allow identification of turtles as  
113 ‘painted’.

114 Turtles were painted on a single night during turtle survey trips in November (2016),  
115 December (2013, 2014, 2016, 2017) and February (2016). All suitable turtles on the nesting  
116 beach were painted, up to a maximum of 2000 (Table 1). The upper limit was determined by  
117 logistical constraints and time while the lower limit was influenced by nesting turtle numbers.

118 **Table 1. Summary of survey periods, number of turtles marked and survey methods**  
119 **conducted.**

| Survey period | Marked turtles | Number of surveys |     |     |
|---------------|----------------|-------------------|-----|-----|
|               |                | Vessel observer   | UVW | UAV |
| Dec 2013      | 2000           | 6                 | 1   | -   |
| Dec 2014      | 1930           | 3                 | 3   | -   |
| Feb 2016      | 482            | 5                 | 6   | -   |
| Nov 2016      | 781            | 6                 | 6   | -   |
| Dec 2016      | 2000           | 6                 | 5   | 3   |
| Dec 2017      | 2000           | 2                 | 3   | 3   |

120

## 121 **In-water detectability of marked and unmarked turtles**

122 We tested the detectability of submerged green turtles using a model, which was  
123 constructed from plywood to represent an average-sized nester with curved carapace length  
124 of 106 cm (Limpus, 2003) and painted appropriately. The model was lowered on a rope and  
125 the depth at which it was no longer discernible as a turtle was recorded. A painted white  
126 plywood board the same size and colour as the turtle marks was then attached to the model to  
127 simulate a marked turtle. The model was again lowered to determine the depth that the white  
128 marking was still obvious. Single samples for each treatment were undertaken at three  
129 locations that represented the range of water conditions around the island from coastal aspect  
130 (site 1) to between reef channel (site 2) to open ocean aspect (site 3) (Fig 1c).

## 131 **Mark-resight counting methods**

132 Surveys were undertaken between November and February during 2013 to 2017.  
133 Turtles were counted if the turtle shape was discernible and the presence/absence of the  
134 painted white mark was recorded. A pilot study using SO, UWV and UAV methods  
135 indicated that the white markings were visibly obvious and the presence-absence of the mark  
136 was never in doubt. All unmarked turtles were considered to be adult female turtles, because

137 previous surveys (Limpus, 2003) demonstrated the minimal presence of adult males and  
138 juveniles during the survey period. Wind speed was mostly low during the surveys (average  
139 maximum wind speed: 11 knots, range: 1 to 18.7 knots). Water clarity measured at three sites  
140 around Raine Island using a standard Secchi disc (30 cm diameter) ranged from 9 to 13  
141 metres.

142 **Surface observer method (SO).** A standardised search area was surveyed in the  
143 waters surrounding the island on the morning and afternoon of the three days following turtle  
144 marking, or less where logistics limited sampling (Table 1 & Fig1c). A 4.2 m outboard  
145 powered rigid hull inflatable vessel with three persons aboard, one recording, one driving and  
146 one counting, was driven along the waters adjacent to the reef perimeter edge in search of the  
147 painted turtles (Fig 1c).

148 **Underwater video method (UWV).** Underwater video surveys were conducted from  
149 the survey vessel simultaneously with the surface observer surveys (Table 1 and Fig1c & 2a).  
150 A GoPro Hero4 camera (frame rate: 25 hz; resolution: 1080; field of view: 127°) with an  
151 extended life battery was attached to the hull of the vessel pointing forward and downward,  
152 and recorded throughout the entire reef perimeter survey period. Video footage was reviewed  
153 by one observer using a single tally counter to record female turtles that could be scored  
154 positively for turtle shape outline and for the presence/absence of the white paint mark during  
155 separate video replays. Video playback was paused during peak turtle density periods and  
156 playback speed adjusted for counting efficiency and accuracy.

157

158



159 **Figure 2. UWV and UAV survey image examples.** (a) Still image from underwater video  
160 December 2017 survey and (b) still image from UAV video survey December 2017 at 50 m  
161 survey altitude.

162 **UAV method.** UAV surveys were conducted as close to midday as possible to reduce  
163 sun glare on the water surface. A DJI Inspire 1 UAV with Zenmuse X3 camera (frame rate:  
164 25 hz; resolution: 1080; field of view: 94°) was flown at an altitude of 50 m and a speed of 5  
165 m/s along a path consistent with that of the surface observer and underwater video surveys  
166 (Figs 1c & 2b and S1 multimedia). This camera and 20 mm equivalent lens provided a  
167 horizontal video survey swathe of 90 m at the sea surface. The UAV pilot was in the same  
168 vessel used for the surface observer and underwater video surveys, which followed closely  
169 behind the UAV. Video footage was analysed as described for UWV surveys.

170

## 171 **Statistical analyses**

172 We first compared detection depths of the turtle model (with and without the painted  
173 mark) at the three sites using a Student *t* test on  $\log_e$  transformed Secchi depths. We then  
174 compared the relative probability of detecting a marked (painted carapace) turtle between  
175 survey methods using a generalised linear mixed effects model (GLMM) with a binomial link  
176 function. A mixed-effects design was required because each batch of marked turtles was  
177 observed twice daily for five days. The optimal variance structure for the random effects was  
178 first explored using the ‘lme4’ package (lme4 v. 0.999375-35) of the R statistical  
179 environment (v. 2.13.1; R Development), using residual diagnostics and Akaike’s  
180 Information Criterion (AIC) of different mixed models (following Zuur et al., 2009). A model  
181 that allowed the slope of the day within nesting season effect to vary resulted in only a  
182 marginal improvement in AIC over a model that included a nested random effect of diel

183 period (morning or afternoon) within day and nesting season. The relative probability (P) of  
184 detecting a painted green turtle (M) was therefore modelled by:

$$M_{ijk} \sim \text{Binomial}(N_{ijk}, P_{ijk})$$
$$\text{logit}(P_{ijk}) = \alpha + \beta(\text{Method}) + b_i + b_{ij} + b_{ijk} + \varepsilon_{ijk} \quad (\text{Equation 1})$$

187 where the relative probability of detecting a marked green turtle (P) in a given time period  
188 (i), day (j) and nesting season (k) is a function of the survey method (Method). Other terms in  
189 the model are the total number of turtles that were resighted (N), the general intercept ( $\alpha$ ), the  
190 random intercepts (b) and the residual error ( $\varepsilon_{ijk}$ ). Equation 1 was fitted in a Bayesian  
191 framework using the ‘mcmcGLMM’ package and vague priors.

192 We then explored the gain in accuracy and precision in the LP estimator (Williams et  
193 al., 2002) from repeated recapture periods using a jackknife procedure. Each jackknife resample  
194 calculated population size as a function of the cumulative average of marked and unmarked  
195 recaptures, up to a maximum of six samples by the end of the third day (i.e. samples were taken  
196 twice daily for three days).

197 We estimated conversion factors for the historical estimates as the quotient of the  
198 mean population estimates, e.g. the conversion factor for SO to UWV estimate was the SO  
199 population estimate divided by the UWV population estimate. To explore how this  
200 conversion factor varied with population size, we fitted a linear regression of conversion  
201 factor against SO population size. Finally, we compared the number and densities of turtles  
202 sighted in each method using general linear models.

203

## 204 **Results and discussion**

### 205 **In-water detectability of marked and unmarked turtles**

207 The white mark was discernible at an average of 3 metres deeper than the turtle model  
208 ( $t = 3.61$ ,  $df = 3.8$ ,  $p = 0.026$ ).

## 209 **Comparison of detectability between methods**

210 Results consistently demonstrated a higher detection ratio of marked:unmarked turtles  
211 using UAV and UWV when compared with the SO method. Analysis of this data translates to  
212 significantly higher LP population estimates from the UAV and UWV methods compared to  
213 the SO method (Table 2 & Fig 3).

214

215 **Table 2. Mean values for total mature female turtles counted and Lincoln Peterson**  
216 **estimates for periods surveyed by each method with standard error.**

| Survey period | Vessel surface observer |                   |        | UWV           |                   |         | UAV           |                   |        |
|---------------|-------------------------|-------------------|--------|---------------|-------------------|---------|---------------|-------------------|--------|
|               | Total turtles           | Peterson estimate | S.E    | Total turtles | Peterson estimate | S.E     | Total turtles | Peterson estimate | S.E    |
| Dec 2013      | 3167.2                  | <b>58817.8</b>    | 6095.1 | 4289.0        | <b>102142.9</b>   | 10969.9 | -             | -                 | -      |
| Dec 2014      | 1002.7                  | <b>14439.1</b>    | 1174.1 | 534.0         | <b>18827.3</b>    | 2470.9  | -             | -                 | -      |
| Feb 2016      | 169.2                   | <b>4708.7</b>     | 1116.3 | 194.8         | <b>5398.2</b>     | 1351.5  | -             | -                 | -      |
| Nov 2016      | 728.8                   | <b>8838.1</b>     | 1074.4 | 1000.5        | <b>13180.8</b>    | 1756.6  | -             | -                 | -      |
| Dec 2016      | 705.5                   | <b>12377.5</b>    | 1089.1 | 1275.8        | <b>18135.9</b>    | 1496.1  | 1460.0        | <b>19682.9</b>    | 1553.2 |
| Dec 2017      | 1596.5                  | <b>20009.4</b>    | 1618.7 | 1679.3        | <b>33263.1</b>    | 3198.1  | 4622.3        | <b>37035.0</b>    | 2334.0 |

217

218

219 **Fig 3. Lincoln Peterson population estimates for periods surveyed by each method.** Error  
220 bars shown are  $\pm 1$  standard error.

221

222 Survey period accounted for 96.8% of variation (highest posterior density intervals  
223 from 82.6 and 99.6% ) in the relative probability of detecting a marked turtle, compared to

224 negligible variance components associated with sampling day ( $2.58 \times 10^{-5}$  %, nested within  
225 sampling period) or time of day ( $5.17 \times 10^{-5}$  %, nested within sampling day and sampling  
226 period). On average, 9.45 % of turtles detected using the SO method were marked (95% CI:  
227 5.24% to 15.29%), compared to 6.58% for the UWV method (95% CI: 3.21% to 12.02%) and  
228 6.26% for the UAV method (95% CI: 2.86 to 12.07%) (Fig 4).

229

230

231 **Fig 4: proportion of marked turtles detected for each method.** Plot legend is (red: surface  
232 observer; blue, underwater video; green; UAV) and diel period (circles: morning; triangles:  
233 afternoon). Samples were collected over three successive days on each occasion. The  
234 coloured lines represent the average trend over time for each method and period.

235

236 Once variation associated with survey period was accounted for, there was no  
237 significant difference in detectability between the UAV and UWV methods (Fig 5).

238

239

240 **Fig 5: modelled relative probabilities of detecting marked turtles using each method.**  
241 (SO, surface observer; UWV, underwater video and UAV). The density plots are computed  
242 from the merged posterior draws, where the blue vertical line represents the median and  
243 shaded blue areas are the 80% credibility intervals.

244

245           The relative gain in precision from using repeated measurements was similar across  
246 all three survey methods (Fig 6). There was an obvious gain in using two measurements  
247 (rather than one). Estimates and variances stabilise after three measurements suggesting that  
248 three measurements is sufficient.

249

250

251 **Fig 6: influence of sample size on the Lincoln-Petersen estimate.** Shown here are the  
252 estimates for the Surface observer method and the three sampling periods for which six  
253 samples were available ( $\pm$  95% confidence intervals).

254

255           Due to the major differences between Lincoln-Peterson estimates using Surface  
256 observer and both UWV and UAV techniques, the consistency and subsequent application of  
257 conversion factors was investigated. Conversion factors were calculated by dividing mean LP  
258 estimates between SO, UWV and UAV techniques where surveys using these techniques  
259 were conducted during the same time period. These conversion factors were then averaged to  
260 provide a mean conversion factor (SO to UWV CF = 1.53 (SD = 0.24), SO to UAV CF =  
261 1.73 (SD = 0.18) and UWV to UAV CF = 1.11 (SD = 0.01)).

262 However, there was considerable variation in detection probabilities between sampling  
263 periods, which was likely to be driven by the extreme variability in the density of turtles in  
264 the inter-nesting habitat. Conversion factor calculations for UWV vs SO methods were  
265 compared with population estimates from SO surveys from different seasons. The results  
266 showed a significant linear relationship with a fitted regression line  $y = 1.3436e^{6E-06x}$  with  
267 an  $r^2 = 0.577$  between UWV:SO conversion factor ratio and the seasonal nesting population  
268 density (Fig 7). F-test results show  $F < F$  Critical one-tail ( $1.58 < 5.05$ ) with  $P = 0.31$ .

269 Conversion factor ratio decreases and therefore the agreement in LP estimate between  
270 methods is closer during lower density nesting seasons.

271

272

273 **Fig 7. Conversion factor ratio of UVW vs SO methods compared with population**

274 **estimates from SO surveys from different seasons.** Fitted regression line  $y = 1.3436e^{6E-06x}$

275 has an  $r^2$  value = 0.577

276

277 The use of UAVs to conduct mark/resight surveys is considerably more efficient in  
278 survey time (1:2.5 hrs) and personnel commitment (1:3) than the other survey techniques.

279 UAV surveys can also be conducted in more extreme weather conditions (13:8 ms<sup>-1</sup>) while  
280 still providing precise estimates (Table 3). Consistent rain negates UAV flight options but is

281 not a major impact on the other methods.

282

283 **Table 3. Comparison of the cost effectiveness and logistical considerations for each**

284 **turtle count method.**

| Survey method    | Equipment Cost | Personnel | Survey time | Viable wind conditions |
|------------------|----------------|-----------|-------------|------------------------|
| Surface observer | Low            | 3         | 2.5 hrs     | 8 ms <sup>-1</sup>     |
| UWV              | Low-moderate   | 3         | 2.5 hrs     | 8 ms <sup>-1</sup>     |
| UAV              | Moderate       | 1         | 1 hr        | 13 ms <sup>-1</sup>    |

285 \*The survey time period refers to the total time to cover transects as shown on Figure 1.

286

287 UAVs also searched a larger search swath than the other two methods, resulting in  
288 0.585 km<sup>2</sup> searched on each occasion, compared to an estimated 0.4 km<sup>2</sup> for the UWV  
289 method (assuming a distance of 10 m and a viewing angle of 127°) and 0.5 km<sup>2</sup> for the SO  
290 method (assuming a search radius of 15 from the vessel). The average number of turtles  
291 counted by the UAV tended to be higher (3041) than the other methods (SO: 1228; UWV:  
292 1345) (Table 2 and Fig 8). However, neither total numbers nor densities significantly differed  
293 between methods ( $\log_e$  total numbers:  $D = 2.737$ ,  $df = 2$ ,  $p = 0.375$ ;  $\log_e$  density:  $D = 0.458$ ;  
294  $df=2$ ,  $p= 0.795$ ).

295

296

297 **Fig 8. Mean total turtles counted (painted + unpainted) for periods surveyed by each**  
298 **method.** Error bars shown are  $\pm 1$  standard error.

299

300

## 301 **Discussion**

302 The UAV and UWV methods detected a lower ratio of marked to unmarked turtles  
303 than the SO method, resulting in considerably higher estimates of nester abundance. UAVs  
304 yielded an estimate 1.5x higher than the historical SO method, whereas the UWV method  
305 estimated 1.7x more turtles than the SO method. However, there was considerable variation  
306 in detection probabilities between sampling periods, which was likely to be driven by the  
307 extreme variability in the density of turtles in the inter-nesting habitat, suggesting that robust  
308 correction factors would require more sampling across a range of turtle densities.

309           A key advantage of the UWV and UAV approaches is the ability to review and  
310 playback video at speeds most suitable for accurate counts, especially when turtle  
311 aggregations were dense. The biased attraction of painted turtles to the observer's eye is not  
312 tested or quantified but is considered to be the major factor causing the higher percentage of  
313 painted turtles recorded by the surface observer, resulting in lower overall population  
314 estimates by this method. We posit that the marked differences in the detection rate of  
315 marked turtles between the photographic and visual observer methods is due to visual  
316 searching limits of human observers. The performance of visual searching, as measured by  
317 search accuracy or reaction time, typically declines as the number of objects increases  
318 (Palmer 1994; Eckstein et al 2000). Observer fatigue can also influence detection rates  
319 (Lardner et al 2019). Further, in analysing complex natural or visually noisy scenes, humans  
320 direct visual attention towards regions of high contrast attract visual attention, particularly  
321 reflective surfaces such as white paint that represent high luminance contrast (Einhäuser et al  
322 2003). This effect would be even greater in the noisy environment caused by surface  
323 reflections or surface disturbance (Lardner et al 2019). In our experiment, the white mark was  
324 discernible three meters deeper than the turtle model, suggesting that it may have drawn the  
325 attention of an observer who was subsequently able to discern that it was a turtle. Together,  
326 these mechanisms may explain why a visual observer had a higher probability of identifying  
327 marked turtles than the UAV or underwater video approach. This may also explain the fact  
328 that detection probability was the most similar between the underwater video and the visual  
329 observer in February 2016, when the population estimate was the lowest (Figs. 3&8 and  
330 Table 2). We predict that search accuracy would be greater when there are fewer turtles.

331           The in-water detectability of painted and unpainted turtles indicated that turtles were  
332 identifiable to 10 m depth, and that there were no pronounced differences in water clarity  
333 between sampling locations that were likely have influenced the results. However, we did not



334 test how the viewing angle and surface conditions influenced detectability. Counting from the  
335 SO platform was mostly conducted at an angle to the surface of the water, and hence more  
336 subject to interference from glare and surface disturbance than the UAV or UWW method.  
337 This may have also influenced the ratio of painted to unpainted turtles detected, because the  
338 paint on remains visible during these conditions.

339         Compared to variation between sampling periods, there was little variation association  
340 with the timing of sampling or over consecutive samples. This suggests that the population is  
341 closed during sampling, an assumption also supported by the results of two other parallel  
342 studies. Firstly, the rate of mortality is low, with a maximum of 0.045% during the sampling  
343 period (interpolated from Robertson et al, in prep). Secondly, recently satellite tracking of 40  
344 nesters at Raine Island in the 2017-18 and 2018-19 nesting seasons indicated that the vast  
345 majority of turtles remained in the immediate vicinity of the Raine Island reef edge after  
346 successful or unsuccessful laying. This study also supported a lack of bias in the location  
347 availability for detection of painted versus unpainted turtles. It demonstrated no significant  
348 difference between presence within the survey area during the first three days post nesting  
349 (the survey period) and the remaining interesting period (Mark Hamann, James Cook  
350 University, pers. comm.).

351         The use of UAVs to conduct mark-resight surveys is considerably more efficient in  
352 survey time (1:2.5 hrs) and personnel commitment (1:3) than the other survey techniques.  
353 Video analysis to count turtles is done manually at present however automated image  
354 analysis techniques are almost complete and will remove this extra time and personnel  
355 requirement. UAV surveys also still provide quality data when the sea-surface state and wind  
356 (i.e. 8-13 ms<sup>-1</sup> winds) limit the SO or UWW methods, although consistent rain hinders the use  
357 of UAVs. The efficiency of the UAV method also facilitates cost-effective optimisation of

358 the study design by using resampling to increase the precision of the population estimates  
359 (Fig 6).

360 The use of video recording versus the use of overlapping still images to produce a  
361 single orthomosaic image by UAV were both considered. For this application the benefit of  
362 moving video images during counting review provided the ability to adjust playback and  
363 pause footage to enable each individual turtle to be assessed as the UAV moved past.  
364 Movement was then used as part of authenticating turtle recognition, to gain different angle  
365 and reflectance aspects to optimise clarity of each turtle and paint mark and to allow the  
366 closest point of contact to be used in assessment (S2 Table).

367 Although no other studies have used UAVs in conjunction with mark-resight to  
368 estimate turtle abundance, other studies have used the direct count method, whereby counts  
369 of turtles are adjusted for the availability bias (Sykora-Bodie et al 2017). These adjustments  
370 were not deemed necessary in the Raine Island study due to the clear waters allowing  
371 detection to at least a 10 m depth range. The proportion of time spent by turtles in the  
372 detectable range to 10m depth is currently being investigated through studies of time depth  
373 recorders deployed on 21 nesters at Raine Island during the 2018-19 season. This will inform  
374 any bias of detectability for this mark-resight study and for use in total turtle counts  
375 conducted in other locations. Even acknowledging these limitations, our total and density  
376 estimates using the UAV survey method are higher than UAV density measurements of olive  
377 ridley turtles (*Lepidochelys olivacea*) at Costa Rica, the only other mass sea turtle nesting  
378 aggregation in the world. During the low-medium level nesting season in 2016 and the  
379 medium level nesting season in 2017 densities were  $2496 \pm 1441$  turtles  $\cdot$  km<sup>-2</sup> and  $7901 \pm$   
380  $1465$  km<sup>-2</sup> respectively. Low and high-end estimates of turtle density at Costa Rica were  $1299$   
381  $\pm 458$  km<sup>-2</sup> and  $2086 \pm 803$  km<sup>-2</sup> respectively (Sykora-Bodie et al 2017).

382

383

## 384 **Conclusions**

385           In summary, this study indicates that the use of UAVs for in-water mark-resight turtle  
386 population estimation is an efficient and accurate method that can provide an accurate  
387 adjustment for historical adult female population estimates at Raine Island. Underwater video  
388 may continue to be used as a backup method in case of UAV failure or weather restrictions to  
389 flight. This study also provides the basis for accurate nesting population estimation, including  
390 historical data correction, to inform reproductive success parameters for green turtles at Raine  
391 Island. This knowledge is crucial to identify the causes and quantify the levels of nesting and  
392 hatching failure and hatchling production. The data is also essential to the evaluation of  
393 improvements in reproductive success resulting from conservation management interventions  
394 such as re-profiling of the nesting beach and fencing to reduce adult female mortality  
395 (Dunstan, 2018).

396

397

## 398 **Acknowledgements**

399           The Raine Island Recovery Project is a five-year, \$7.95 million collaboration between  
400 BHP, the Queensland Government, the Great Barrier Reef Marine Park Authority, Wuthathi  
401 and Meriam Nation (Ugar, Mer, Erub) Traditional Owners and the Great Barrier Reef  
402 Foundation to protect and restore the island's critical habitat to ensure the future of key  
403 marine species.

404

405           *The funders had no role in study design, data collection and analysis, decision to publish,*  
406 *or preparation of the manuscript.*

407

## 408 **References**

- 409       1. Seminoff, J.A., Allen, C.D., Balazs, G.H., Dutton, P.H., Eguchi, T., Haas, H.,  
410       Hargrove, S.A., Jensen, M., Klemm, D.L. and Lauritsen, A.M. (2015) Status review  
411       of the green turtle (*Chelonia mydas*) under the Endangered Species Act.
- 412       2. Limpus CJ, Miller JD, Parmenter CJ, and Limpus DJ. (2003) The green turtle,  
413       *Chelonia mydas*, population of Raine Island and the northern Great Barrier Reef:  
414       1843-2001. Mem Queensland Mus. Vol: 49: 339-440.
- 415       3. Dunstan AJ, and Robertson K. (2018) Raine Island Recovery Project. 2017-18 Season  
416       technical report to the Raine Island Scientific Advisory Committee and Raine Island  
417       Reference Group. Internal Report to Department of Environment and Science,  
418       Queensland Government, Brisbane, Australia.
- 419       4. Fuentes, M.M.P.B., Limpus, C.J. and Hamann, M. (2011) Vulnerability of sea turtle  
420       nesting grounds to climate change. *Global Change Biology* Vol: 17, 140-153.
- 421       5. Jensen, M.P., Allen, C.D., Eguchi, T., Bell, I.P., LaCasella, E.L., Hilton, W.A., Hof,  
422       C.A.M. and Dutton, P.H. (2018) Environmental Warming and Feminization of One of  
423       the Largest Sea Turtle Populations in the World. *Current Biology* Vol: 28, 154-159  
424       e154.

- 425 6. Grayson, J., Hamanna, M., Marsh, H. and Ambar, S. (2010) Options for Managing  
426 the Sustainable Use of Green Turtles: Perceptions of Hammond Islanders in Torres  
427 Strait. *Conservation and Society* Vol: 8(1): 73-83.
- 428 7. Schuyler, Q., Hardesty, B.D., Wilcox, C. and Townsend, K. (2014) Global Analysis  
429 of Anthropogenic Debris Ingestion by Sea Turtles. *Conservation Biology*, Vol: 28 (1),  
430 pp. 129-139.
- 431 8. Hazel, J. and Gyuris, E. (2006) Vessel-related mortality of sea turtles in Queensland,  
432 Australia. *Wildlife Research*, Vol: 33 (2), pp. 149-154
- 433 9. Wilcox, C., Heathcote, G., Goldberg, J., Gunn, R., Peel, D. and Hardesty, B.D. (2015)  
434 Understanding the sources and effects of abandoned, lost, and discarded fishing gear  
435 on marine turtles in northern Australia. *Conservation Biology*, Vol: 29 (1), pp. 198-  
436 206
- 437 10. Bell, I.P., Meager, J., van de Merwe, J.P. and Madden Hof, C.A. (2019) Green turtle  
438 (*Chelonia mydas*) population demographics at three chemically distinct foraging areas  
439 in the northern Great Barrier Reef. *Science of the Total Environment*, Vol: 652,  
440 pp.1040-1050
- 441 11. Sykora-Bodie ST, Bezy V, Johnston DW, Newton E & Lohmann KJ. (2017)  
442 Quantifying Nearshore Sea Turtle Densities. Applications of Unmanned Aerial  
443 Systems for Population Assessments. *Nature Scientific Reports* Vol: 7 (1) 17690
- 444 12. Pollock, K., and Kendall, W. (1987) Visibility bias in aerial surveys: a review of  
445 estimation procedures. *Journal of Wildlife Management* Vol: 51, 502–510

- 446 13. Schofield G, Katselidis KA, Lilley MKS, Reina RD, Hays GC. (2017) Detecting  
447 elusive aspects of wildlife ecology using UAVs: new insights on the mating dynamics  
448 and operational sex ratios of sea turtles. *Funct. Ecol.* Vol: 31, 2310–2319
- 449 14. Hodgson, A., Kelly, N., and Peel, D. (2013) Unmanned aerial vehicles (UAVs) for  
450 surveying marine fauna: a dugong case study. *PLoS One* 8 2013: e79556.  
451 doi:10.1371/JOURNAL.PONE.0079556
- 452 15. Hodgson JC, Mott R, Baylis SM, Pham TT, Wotherspoon S, Kilpatrick, AD, Segaran,  
453 RR, Reid I, Terauds A, and Koh LP. (2018) UAVs count wildlife more accurately and  
454 precisely than humans. *Methods in Ecology and Evolution* 2018: 9, 1160–1167.  
455 doi:10. 1111/2041-210X.12974
- 456 16. Brooke S, Graham D, Jacobs T, Littnan C, Manuel M and O’Conner R. (2015)  
457 Testing marine conservation applications of unmanned aerial systems (UAS) in a  
458 remote marine protected area. *J Unmanned Vehicle Syst* 2015: 3: 237–251
- 459 17. Limpus, C. J. and Nicholls, N. (1988). Effect of the southern oscillation on green  
460 turtles around northern Australia. *Australian Wildlife Research* 15, 157-161. Limpus,  
461 C. J. and Nicholls, N. (1994).
- 462 18. Limpus, C. and Nicholls, N. (2000). ENSO regulation of Indo-Pacific green turtle  
463 populations. In “Applications of Seasonal Climate Forecasting in Agricultural and  
464 Natural Ecosystems.” (Eds. Hammer, G., Nicholls, N., and Mitchell, C.) Pp. 399-408.  
465 (Kluwer Academic Publishers: Dordrecht.
- 466 19. Eckstein, M.P., Thomas, J.P., Palmer, J. and Shimozaki, S.S. (2000) A signal  
467 detection model predicts the effects of set size on visual search accuracy for feature,  
468 conjunction, triple conjunction, and disjunction displays. *Perception & Psychophysics*  
469 62, 425-451.

- 470 20. Palmer, J. (1994) Set-size effects in visual search: The effect of attention is  
471 independent of the stimulus for simple tasks. *Vision Research* 34, 1703-1721.
- 472 21. Milinski, M. (1977) Experiments on selection by predators against spatial oddity of  
473 their prey. *Zeitschrift Fur Tierpsychologie-Journal of Comparative Ethology* 43, 311-  
474 325.
- 475 22. Krakauer, D.C. (1995) Groups confuse predators by exploiting perceptual bottlenecks:  
476 a connectionist model of the confusion effect. *Behavioral Ecology and Sociobiology*  
477 36, 421-429.
- 478 23. , D.C. (1995) Groups confuse predators by exploiting perceptual bottlenecks: a  
479 connectionist model of the confusion effect. *Behavioral Ecology and Sociobiology* 36,  
480 421-429.
- 481 24. Einhäuser, W. and König, P. (2003) Does luminance-contrast contribute to a saliency  
482 map for overt visual attention? *European Journal of Neuroscience* 17, 1089-1097.
- 483 25. Lardner, B., Yackel Adams, A.A., Knox, A.J., Savidge, J.A. and Reed, R.N. (2019)  
484 Do observer fatigue and taxon bias compromise visual encounter surveys for small  
485 vertebrates? *Wildlife Research* 46, 127-135.
- 486 26. Williams, B. K.; J. D. Nichols; M. J. Conroy (2002). *Analysis and Management of*  
487 *Animal Populations*. San Diego, California: Academic Press. [ISBN 0-12-754406-2](#).

488

489

## 490 **Supporting information**

- 491 **S1 Multimedia. UAV survey video.** Video of UAV survey at 50m altitude over waters adjacent to  
492 Raine Island reef edge.

493

494 **S1 Table. Survey area and estimated densities of turtles sighted using each method**

| Painted turtles | Survey period | Number of surveys |     |     |
|-----------------|---------------|-------------------|-----|-----|
|                 |               | Surface observer  | UWV | AUV |
| 2000            | Dec 2013      | 6                 | 1   |     |
| 1930            | Dec 2014      | 3                 | 3   |     |
| 482             | Feb 2016      | 5                 | 6   |     |
| 781             | Nov 2016      | 6                 | 6   |     |
| 2000            | Dec 2016      | 6                 | 5   | 3   |
| 2000            | Dec 2017      | 2                 | 3   | 3   |

495



(a)

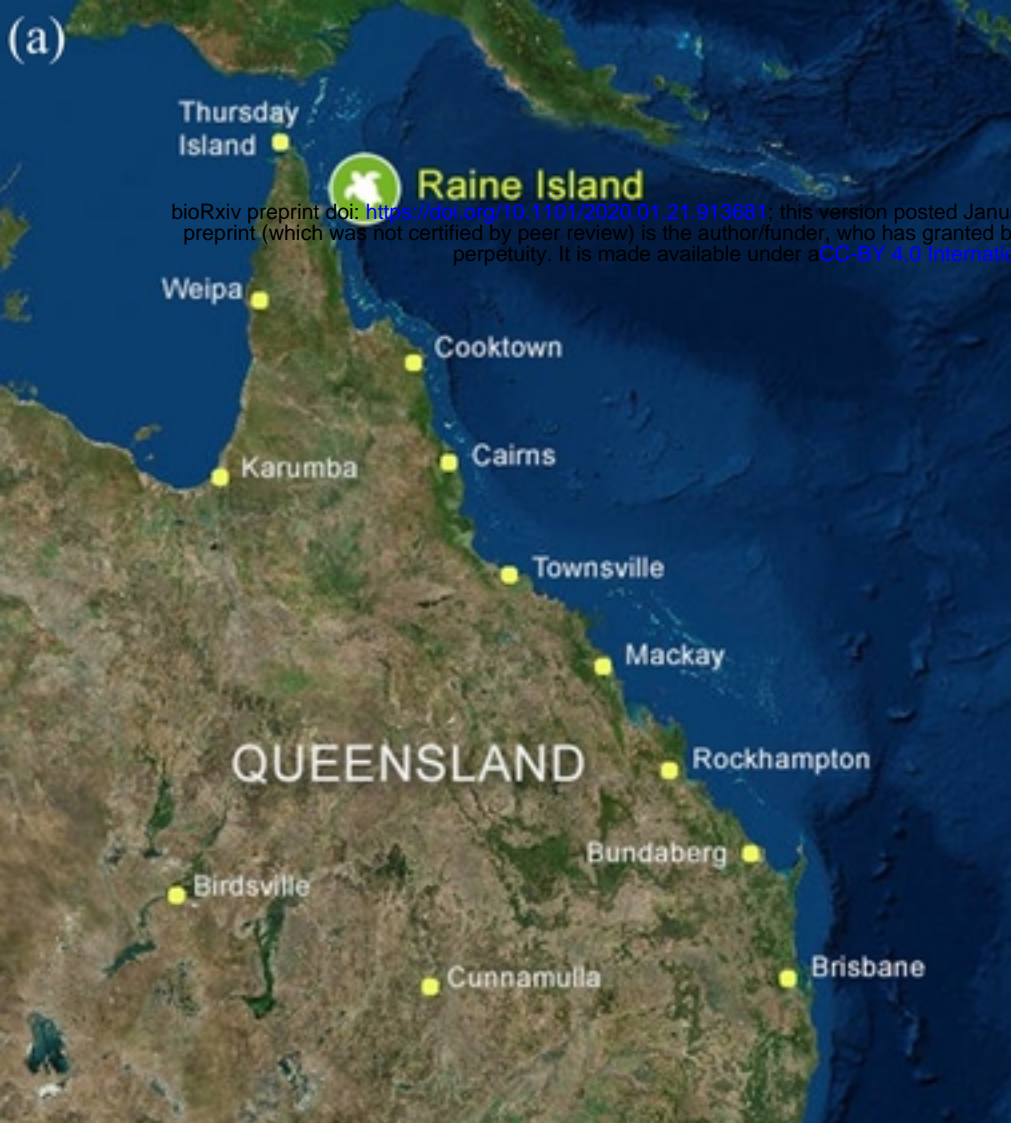

(b)

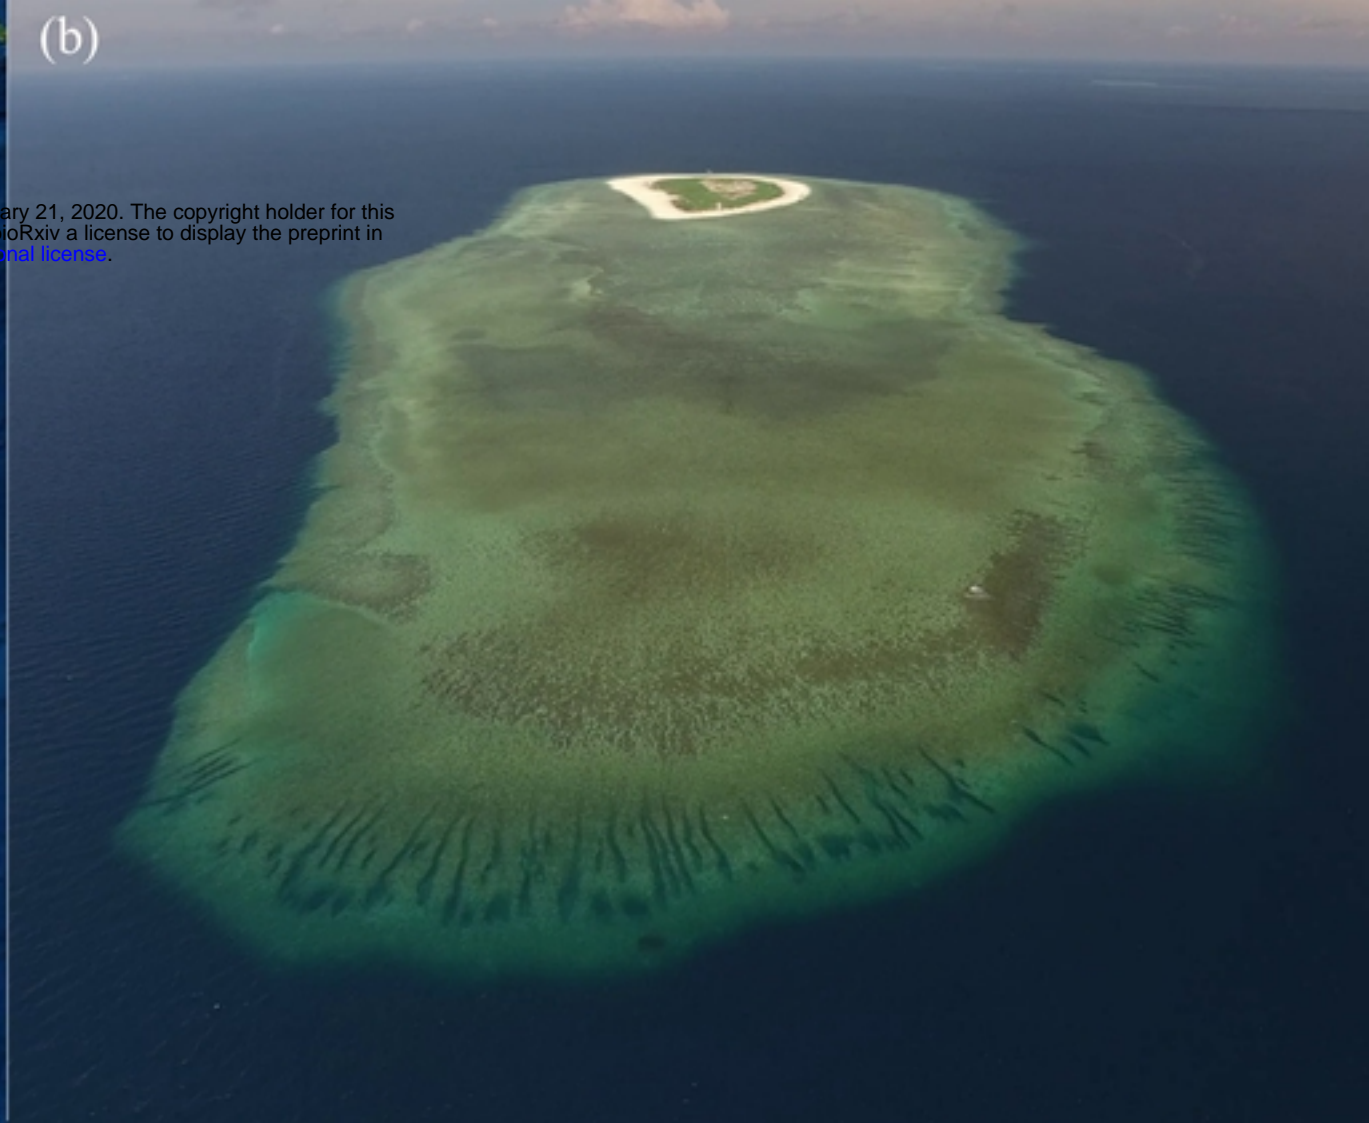

(c)

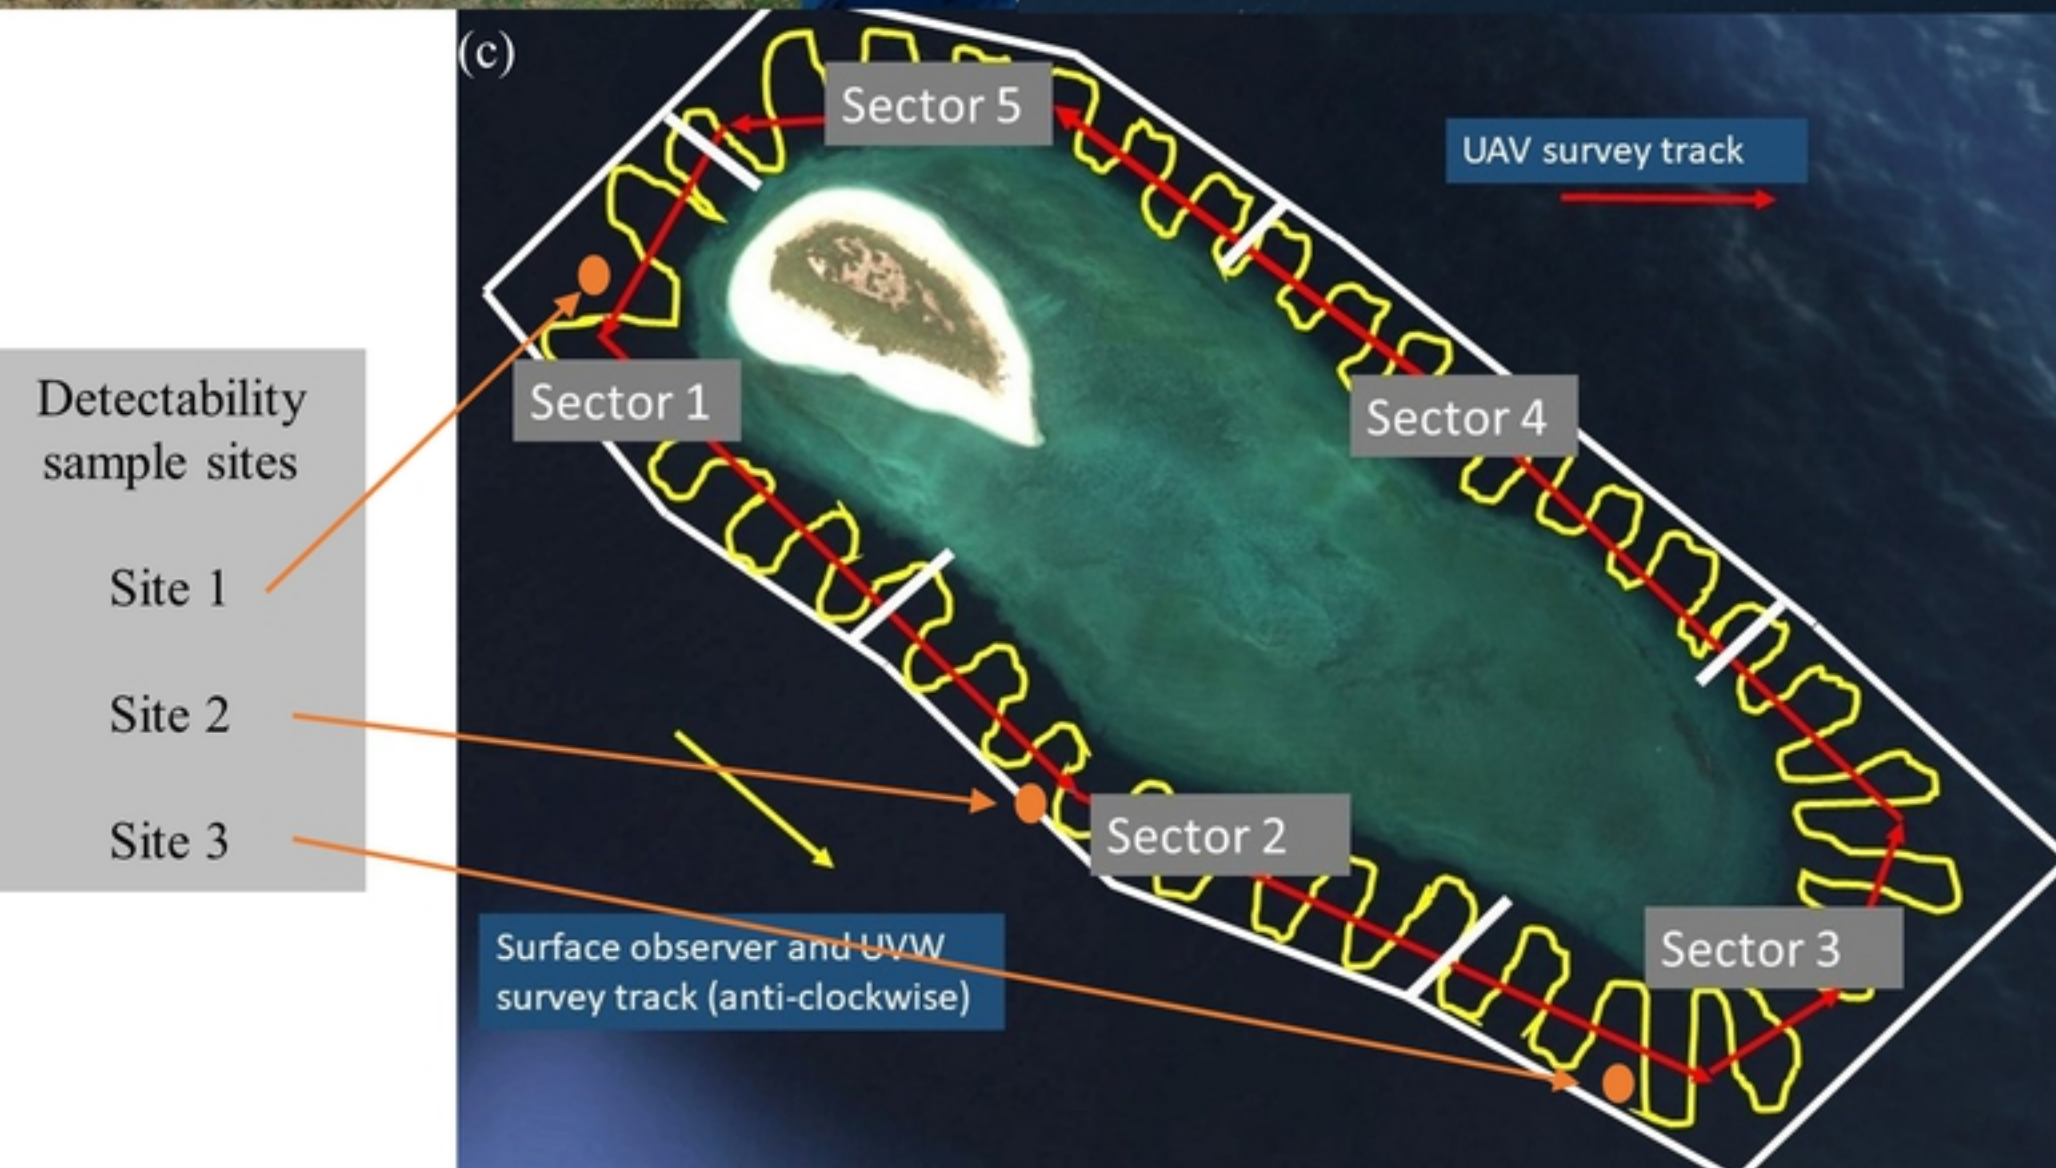

Fig1

(a)

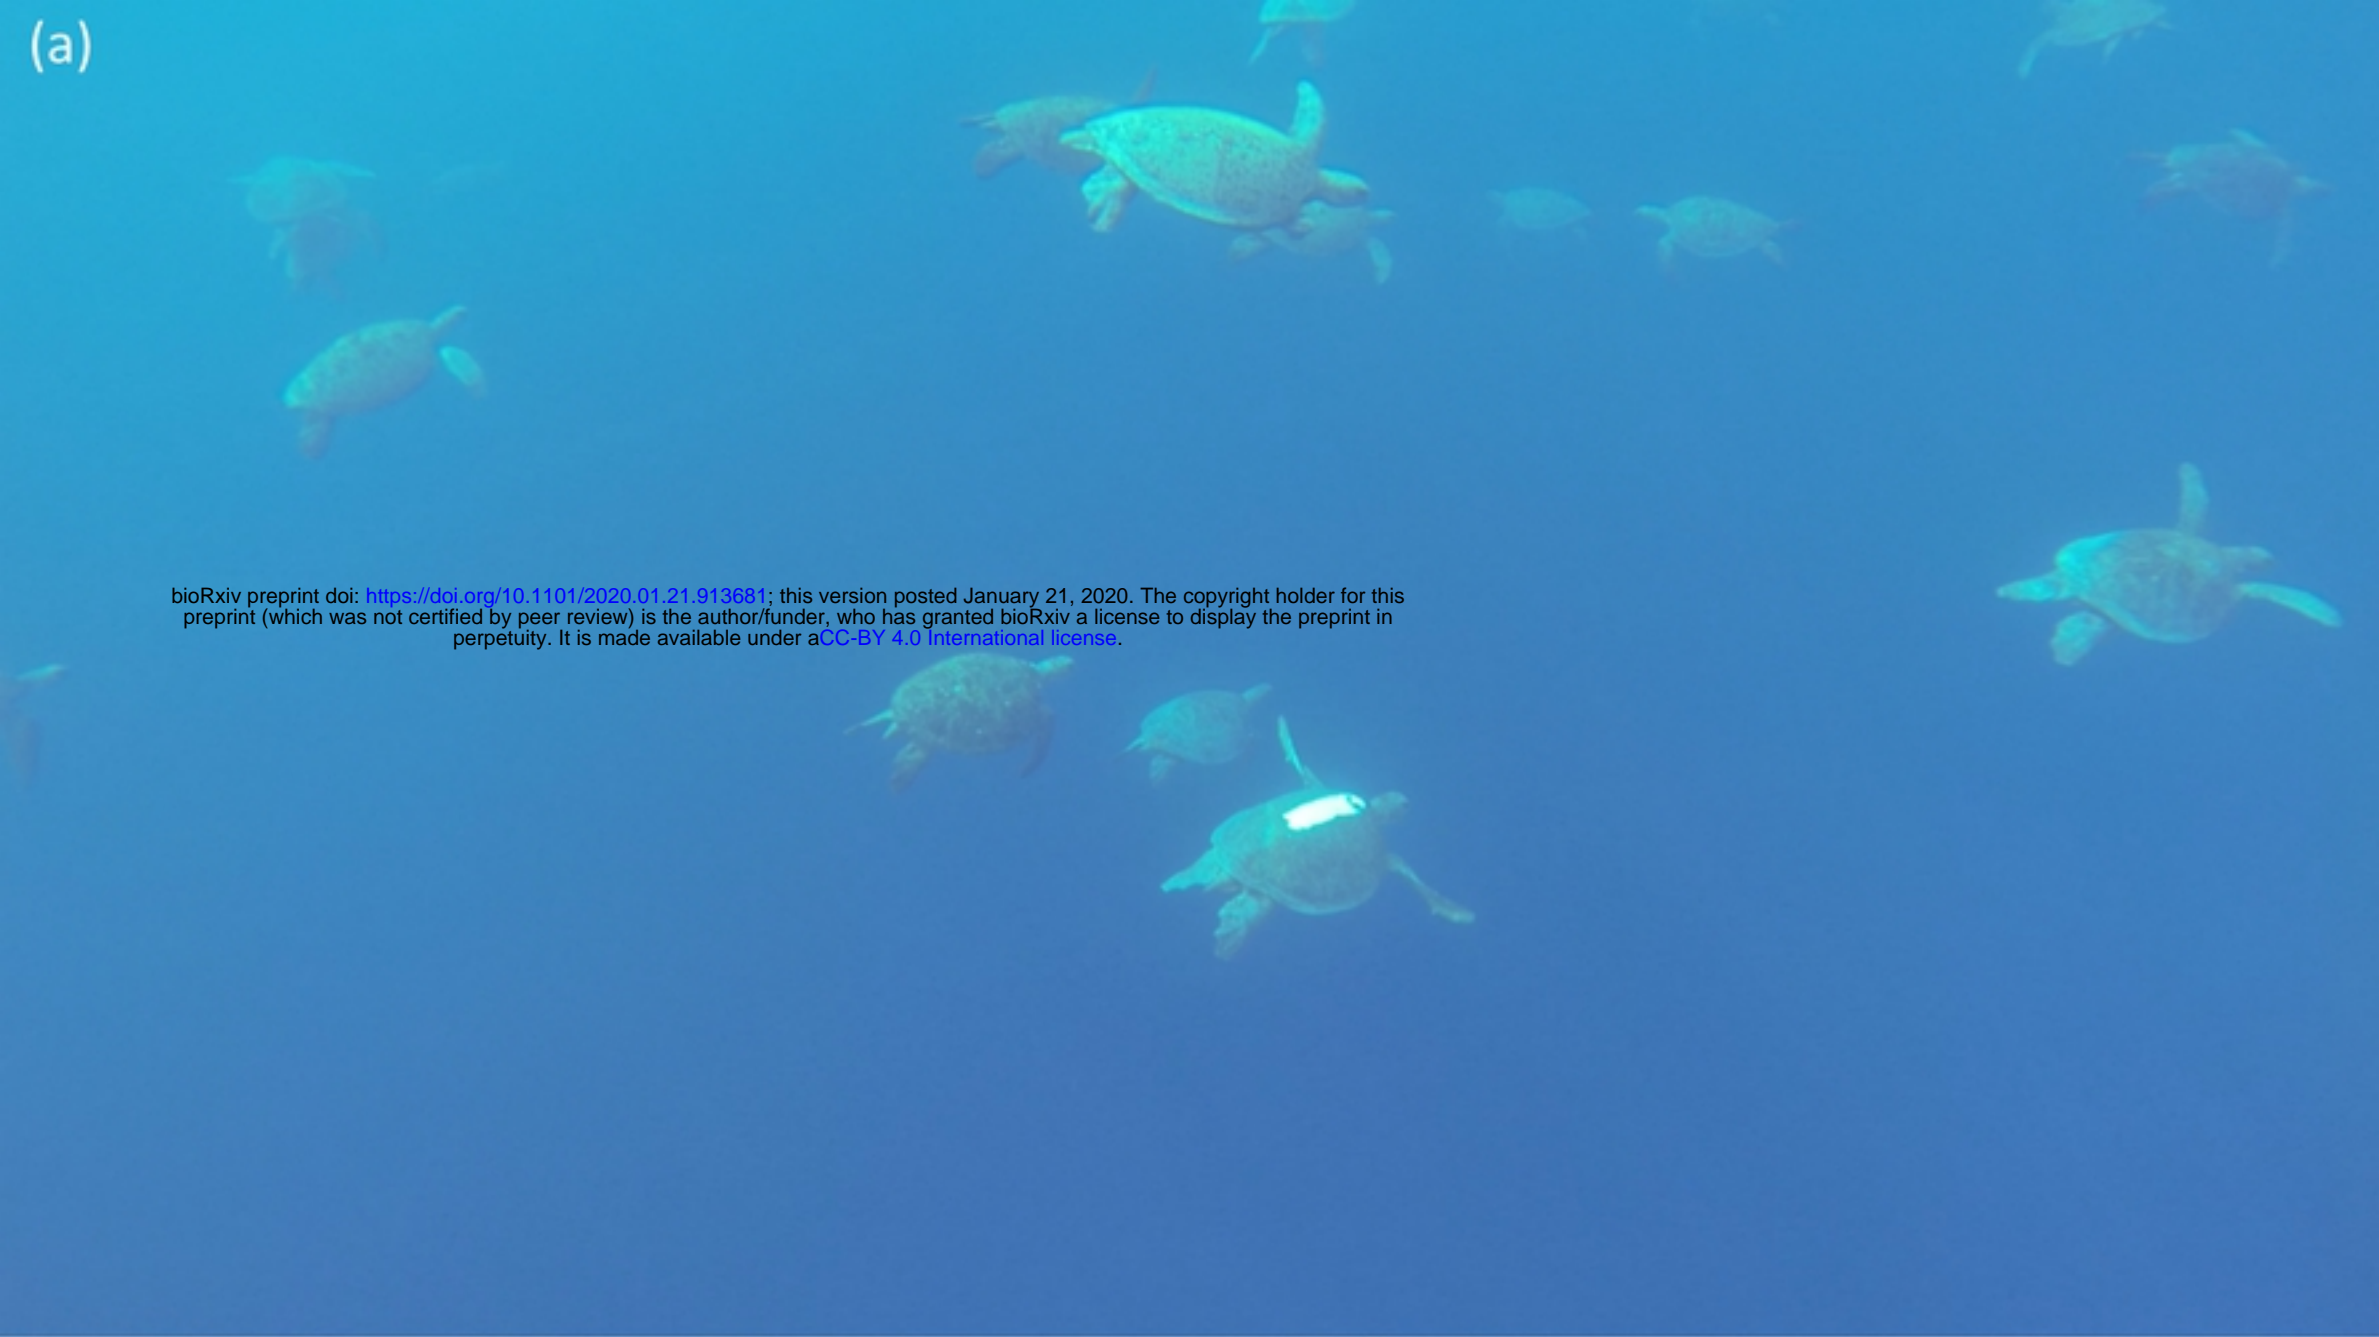

bioRxiv preprint doi: <https://doi.org/10.1101/2020.01.21.913681>; this version posted January 21, 2020. The copyright holder for this preprint (which was not certified by peer review) is the author/funder, who has granted bioRxiv a license to display the preprint in perpetuity. It is made available under aCC-BY 4.0 International license.

(b)

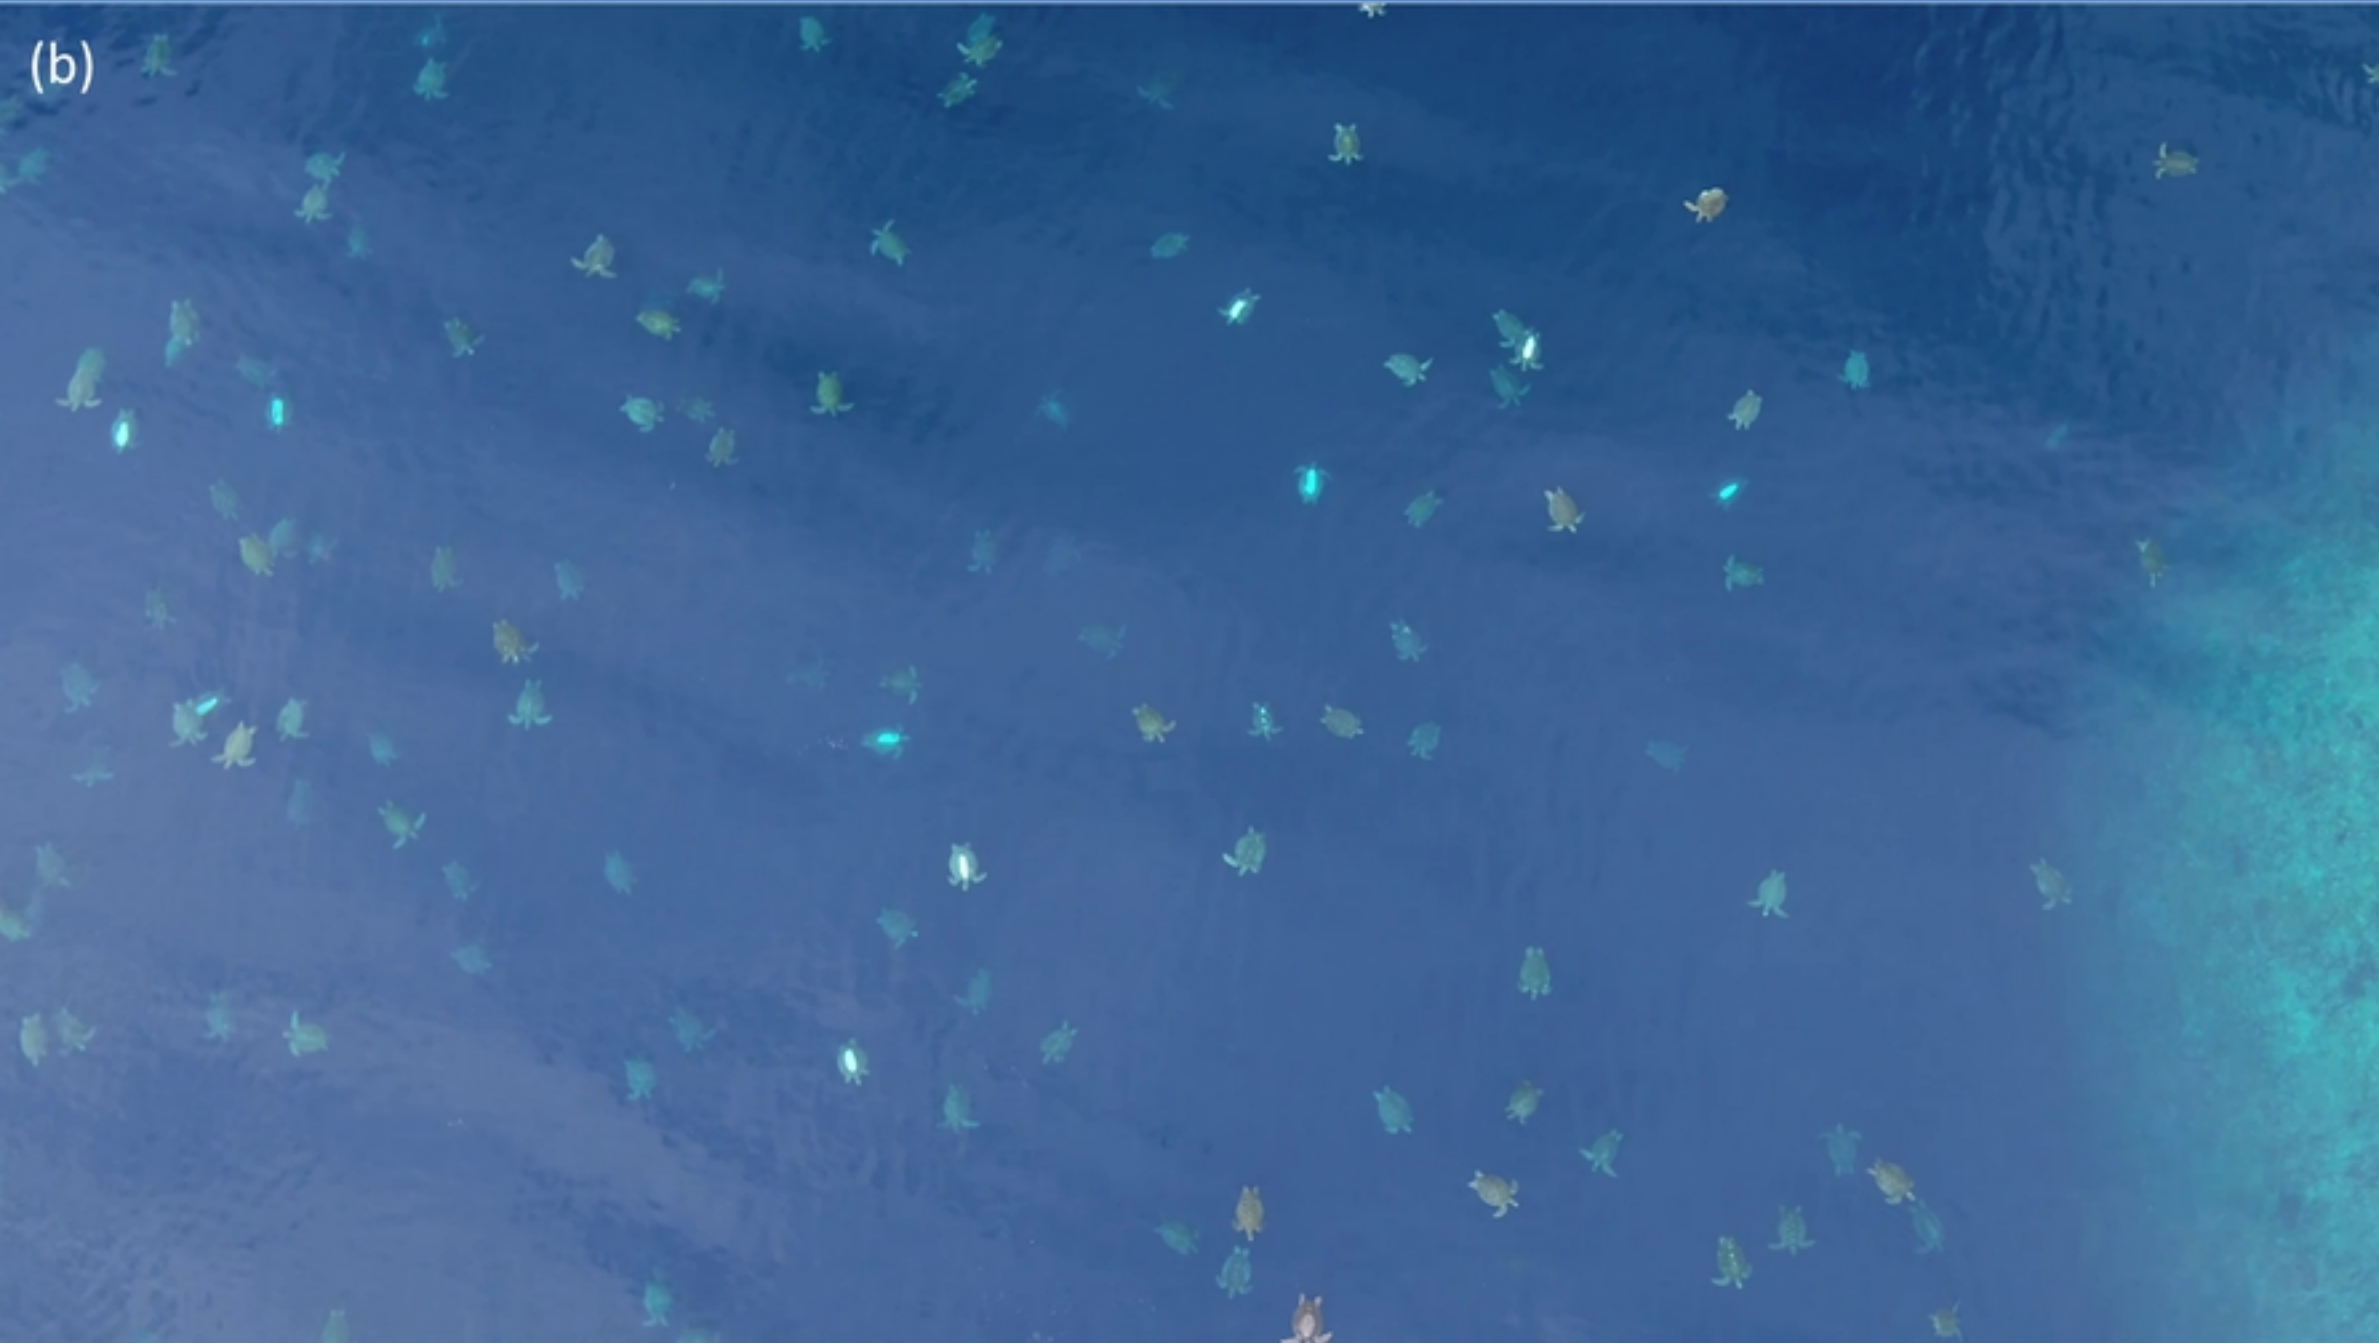

Fig2

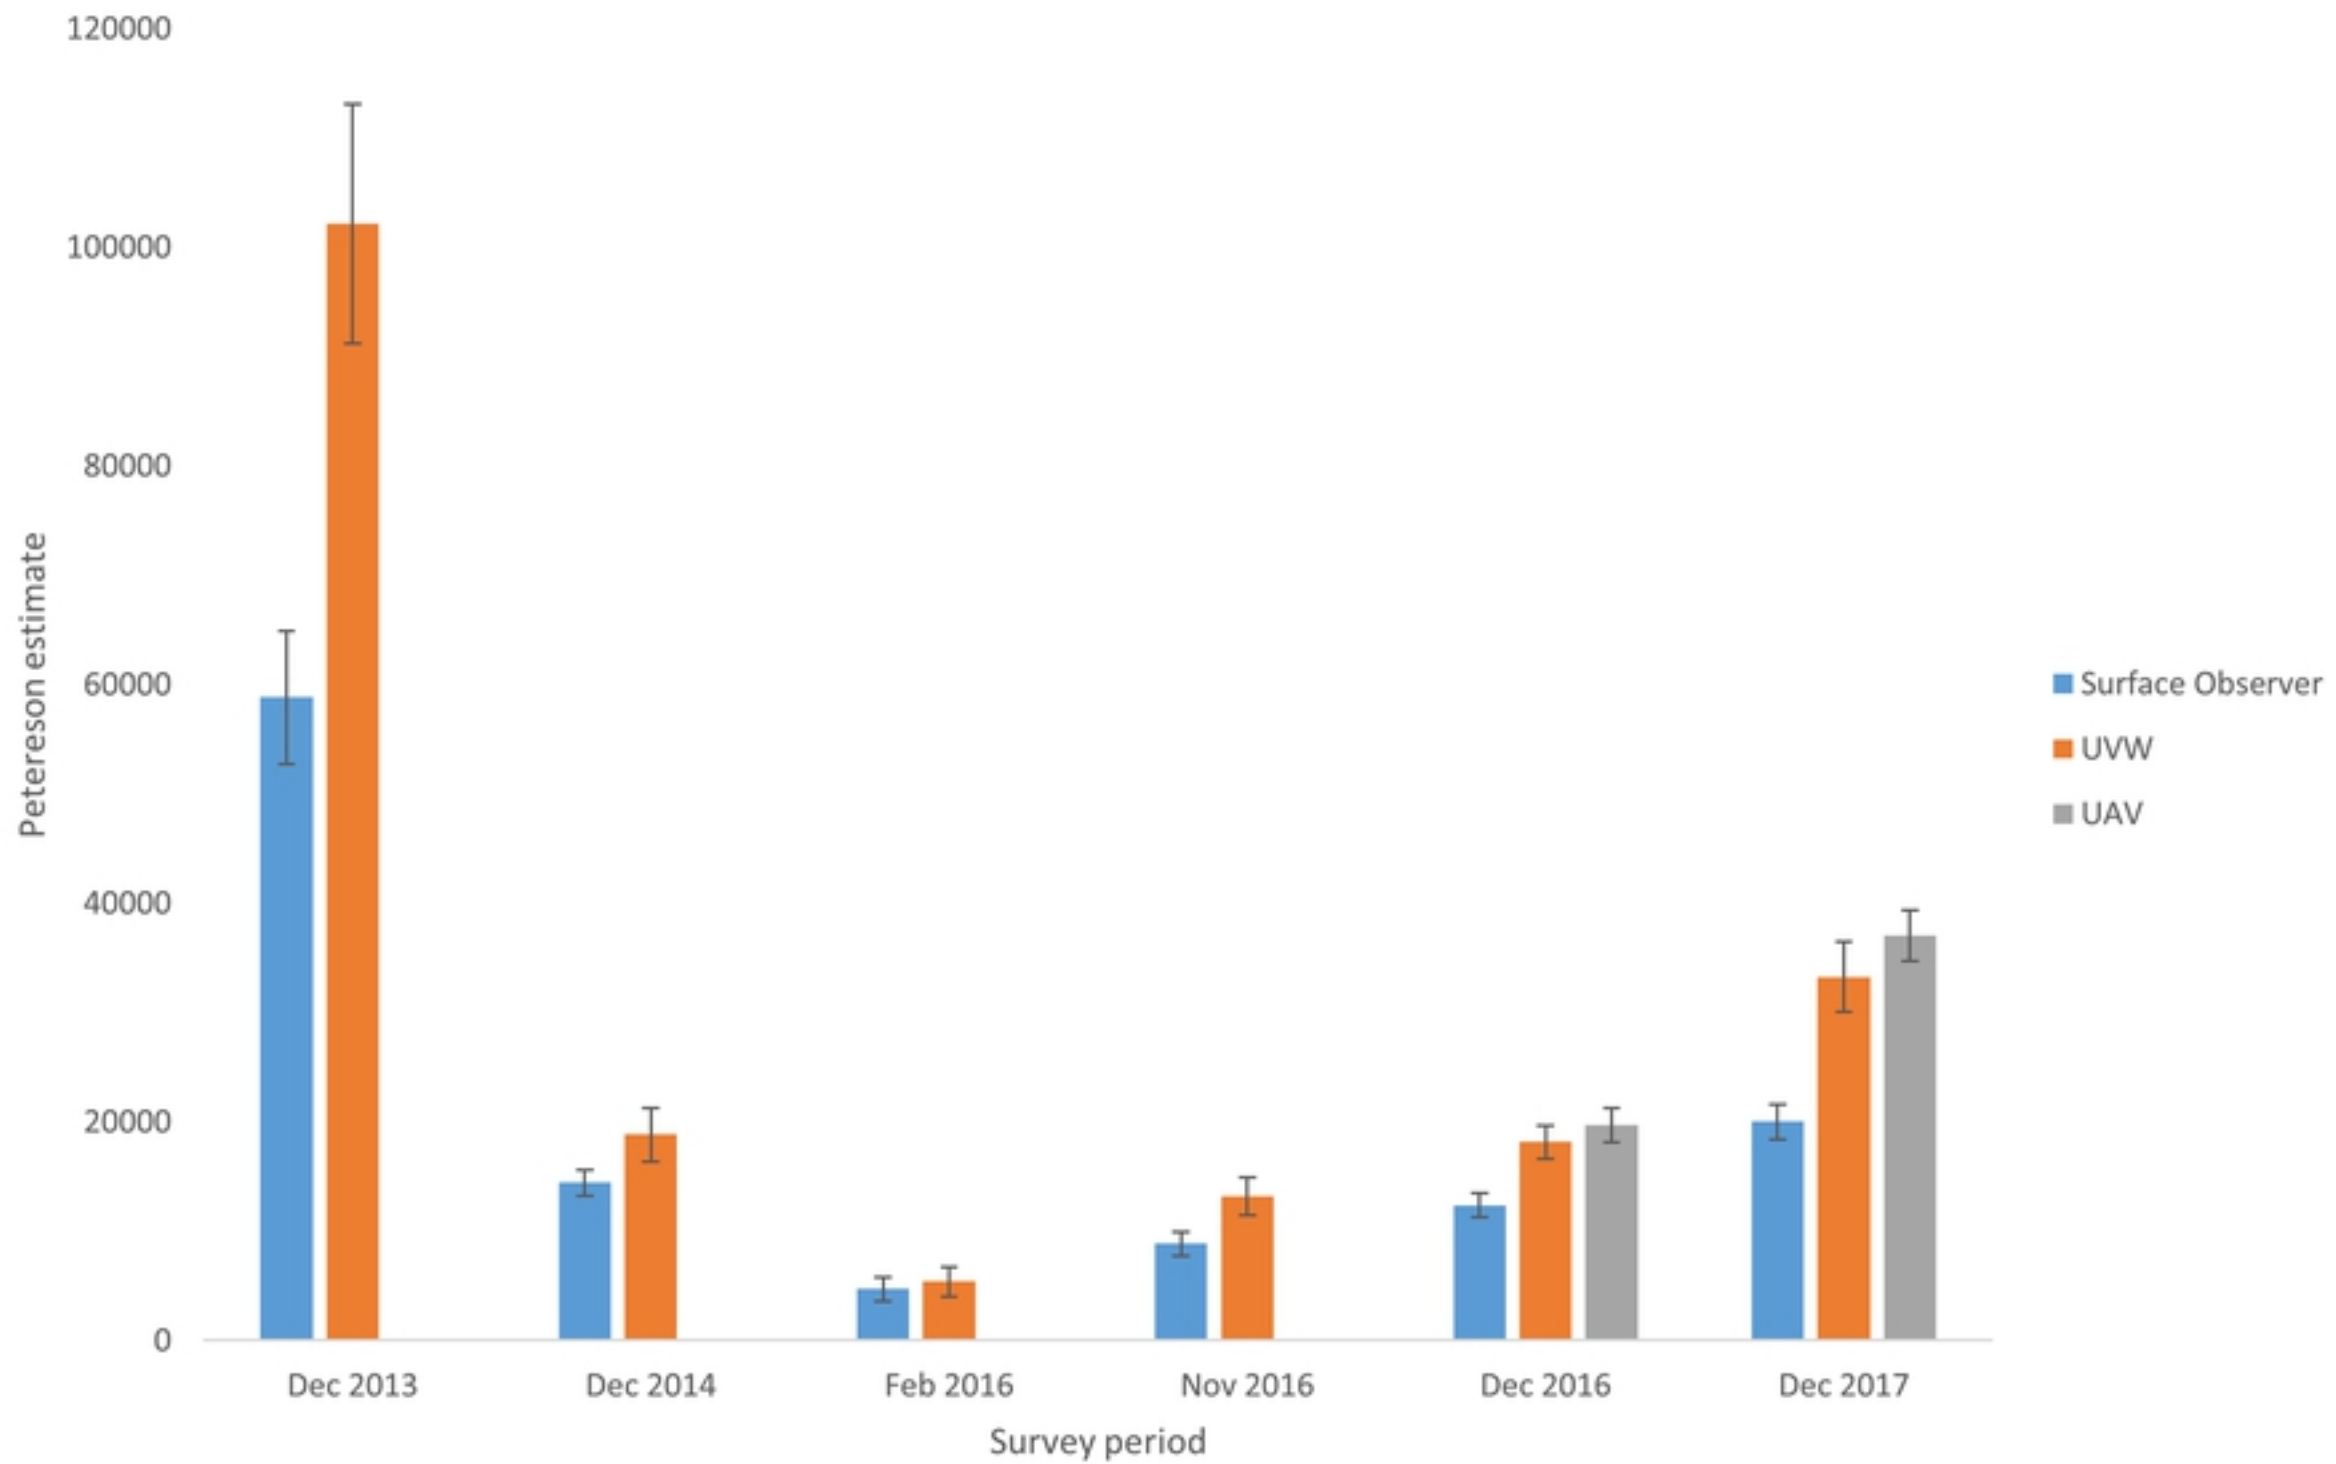

Fig3

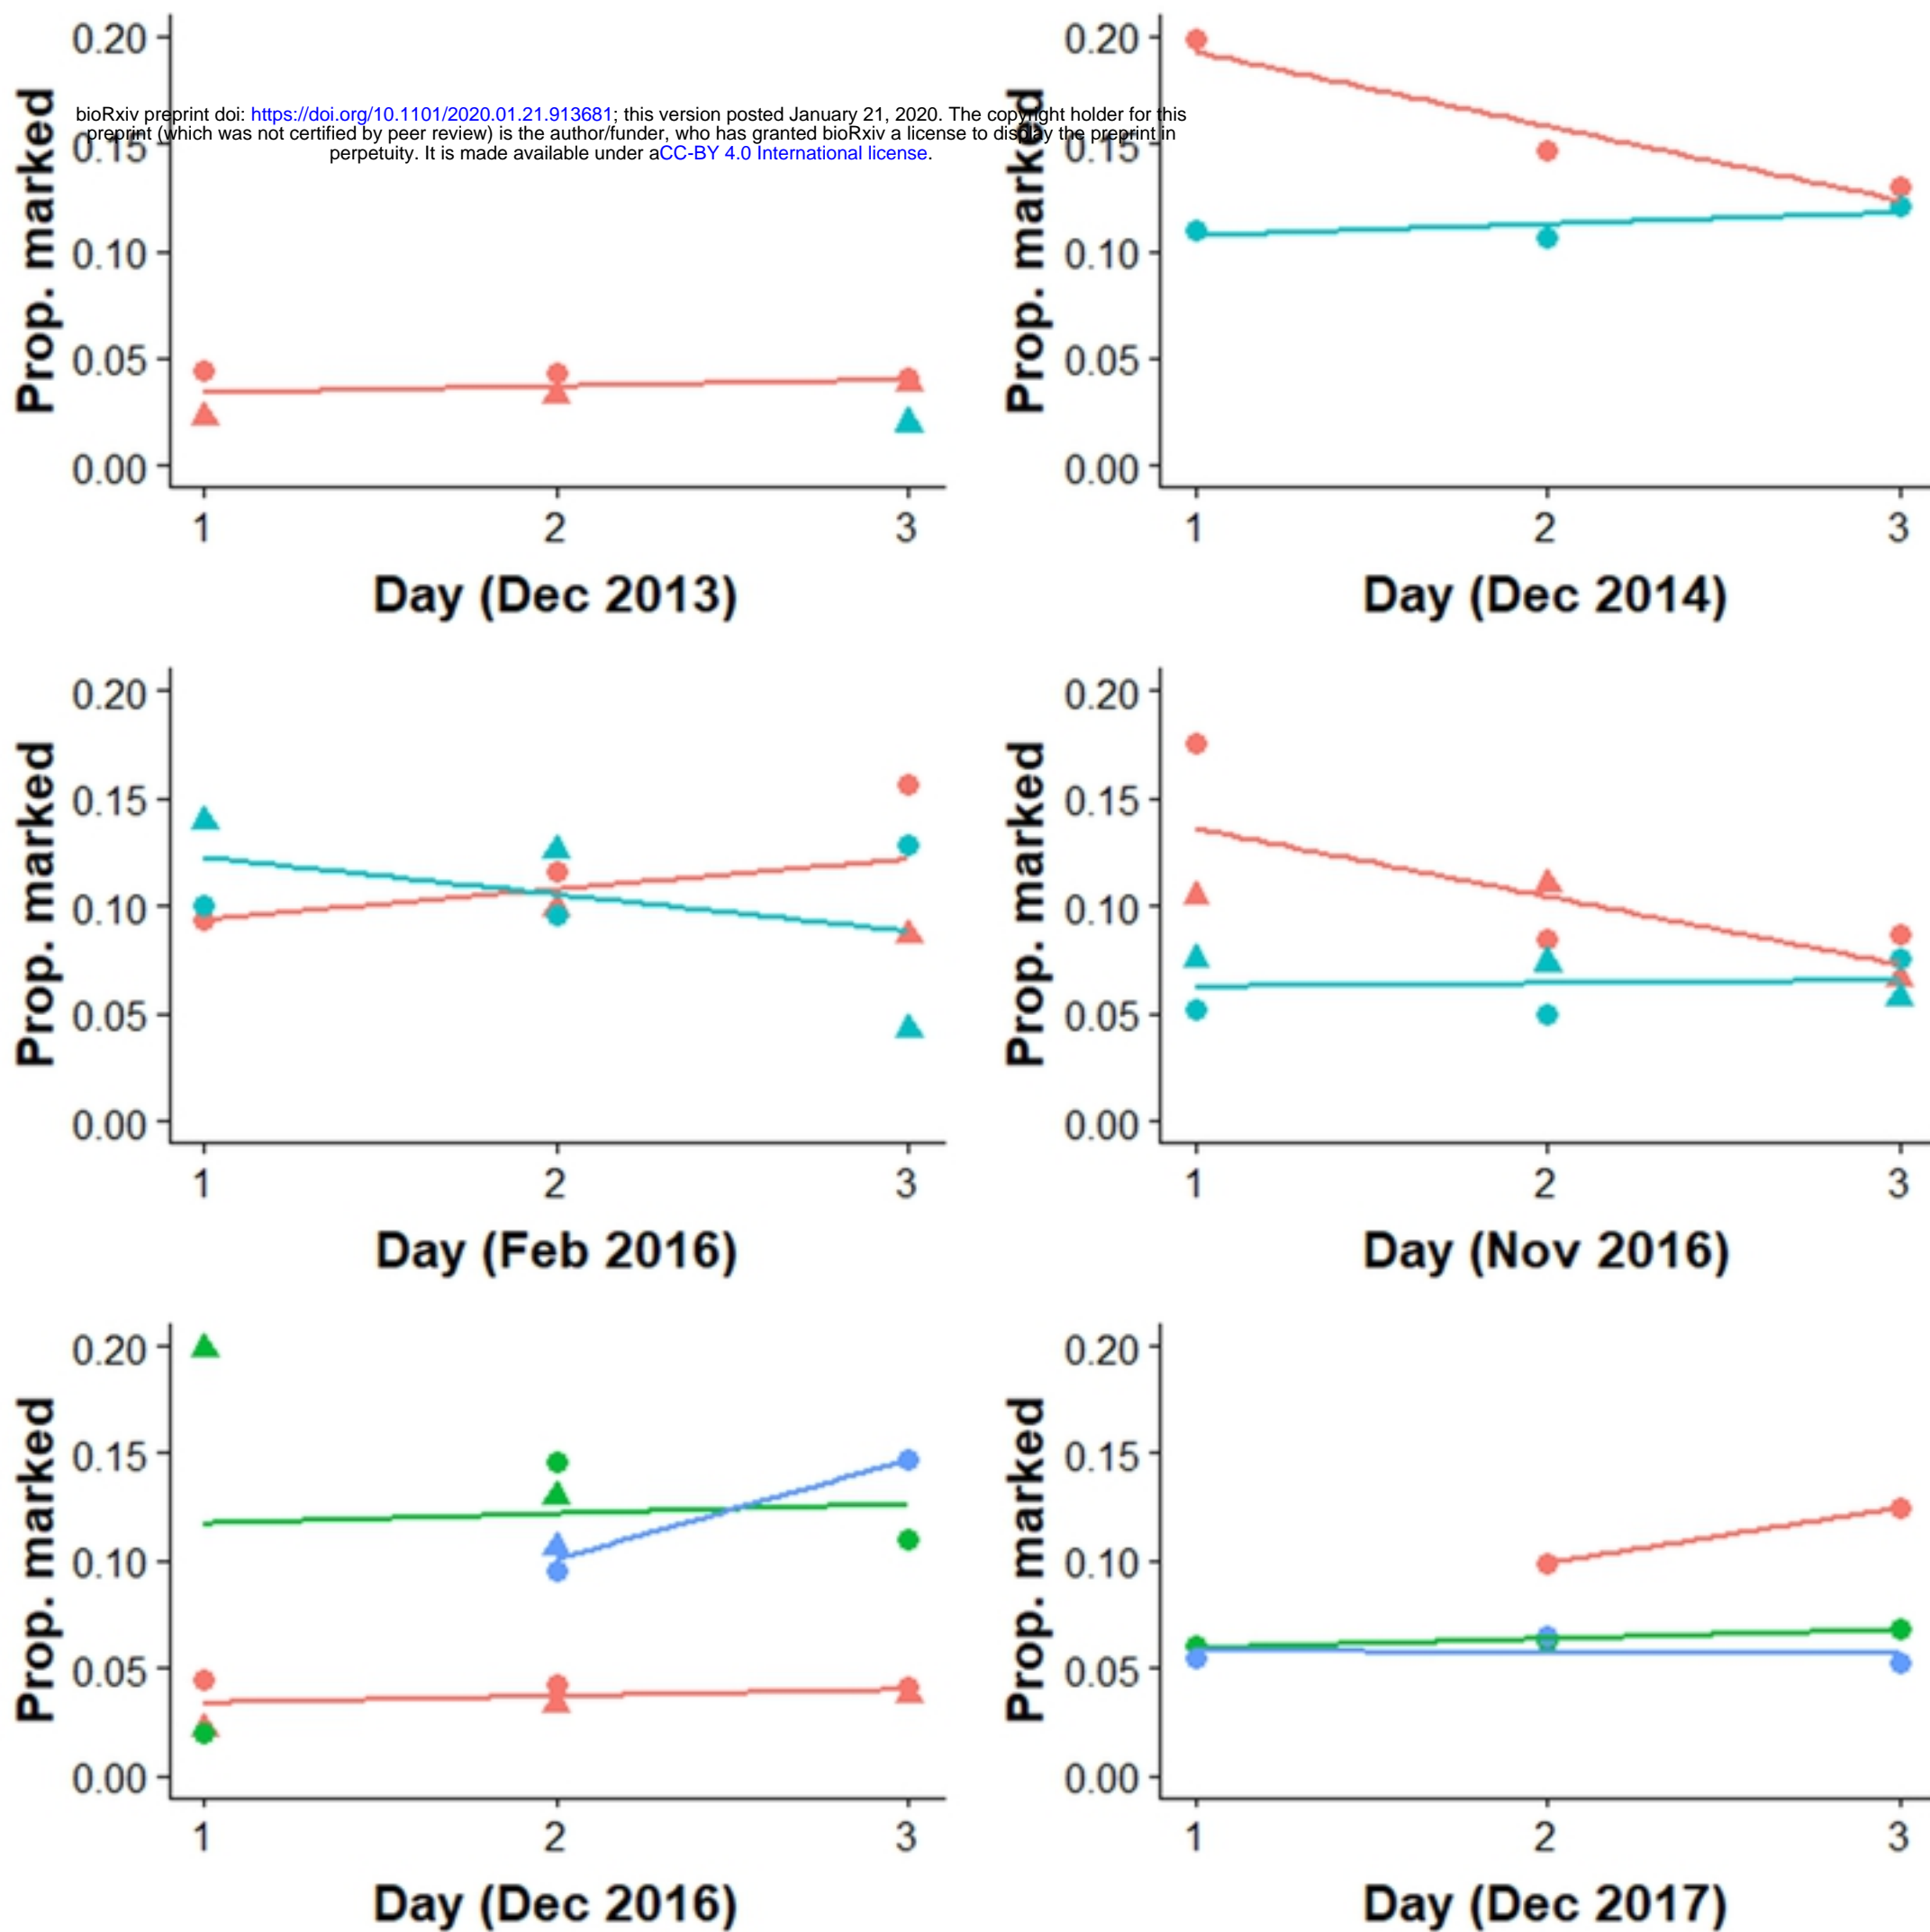

Fig4

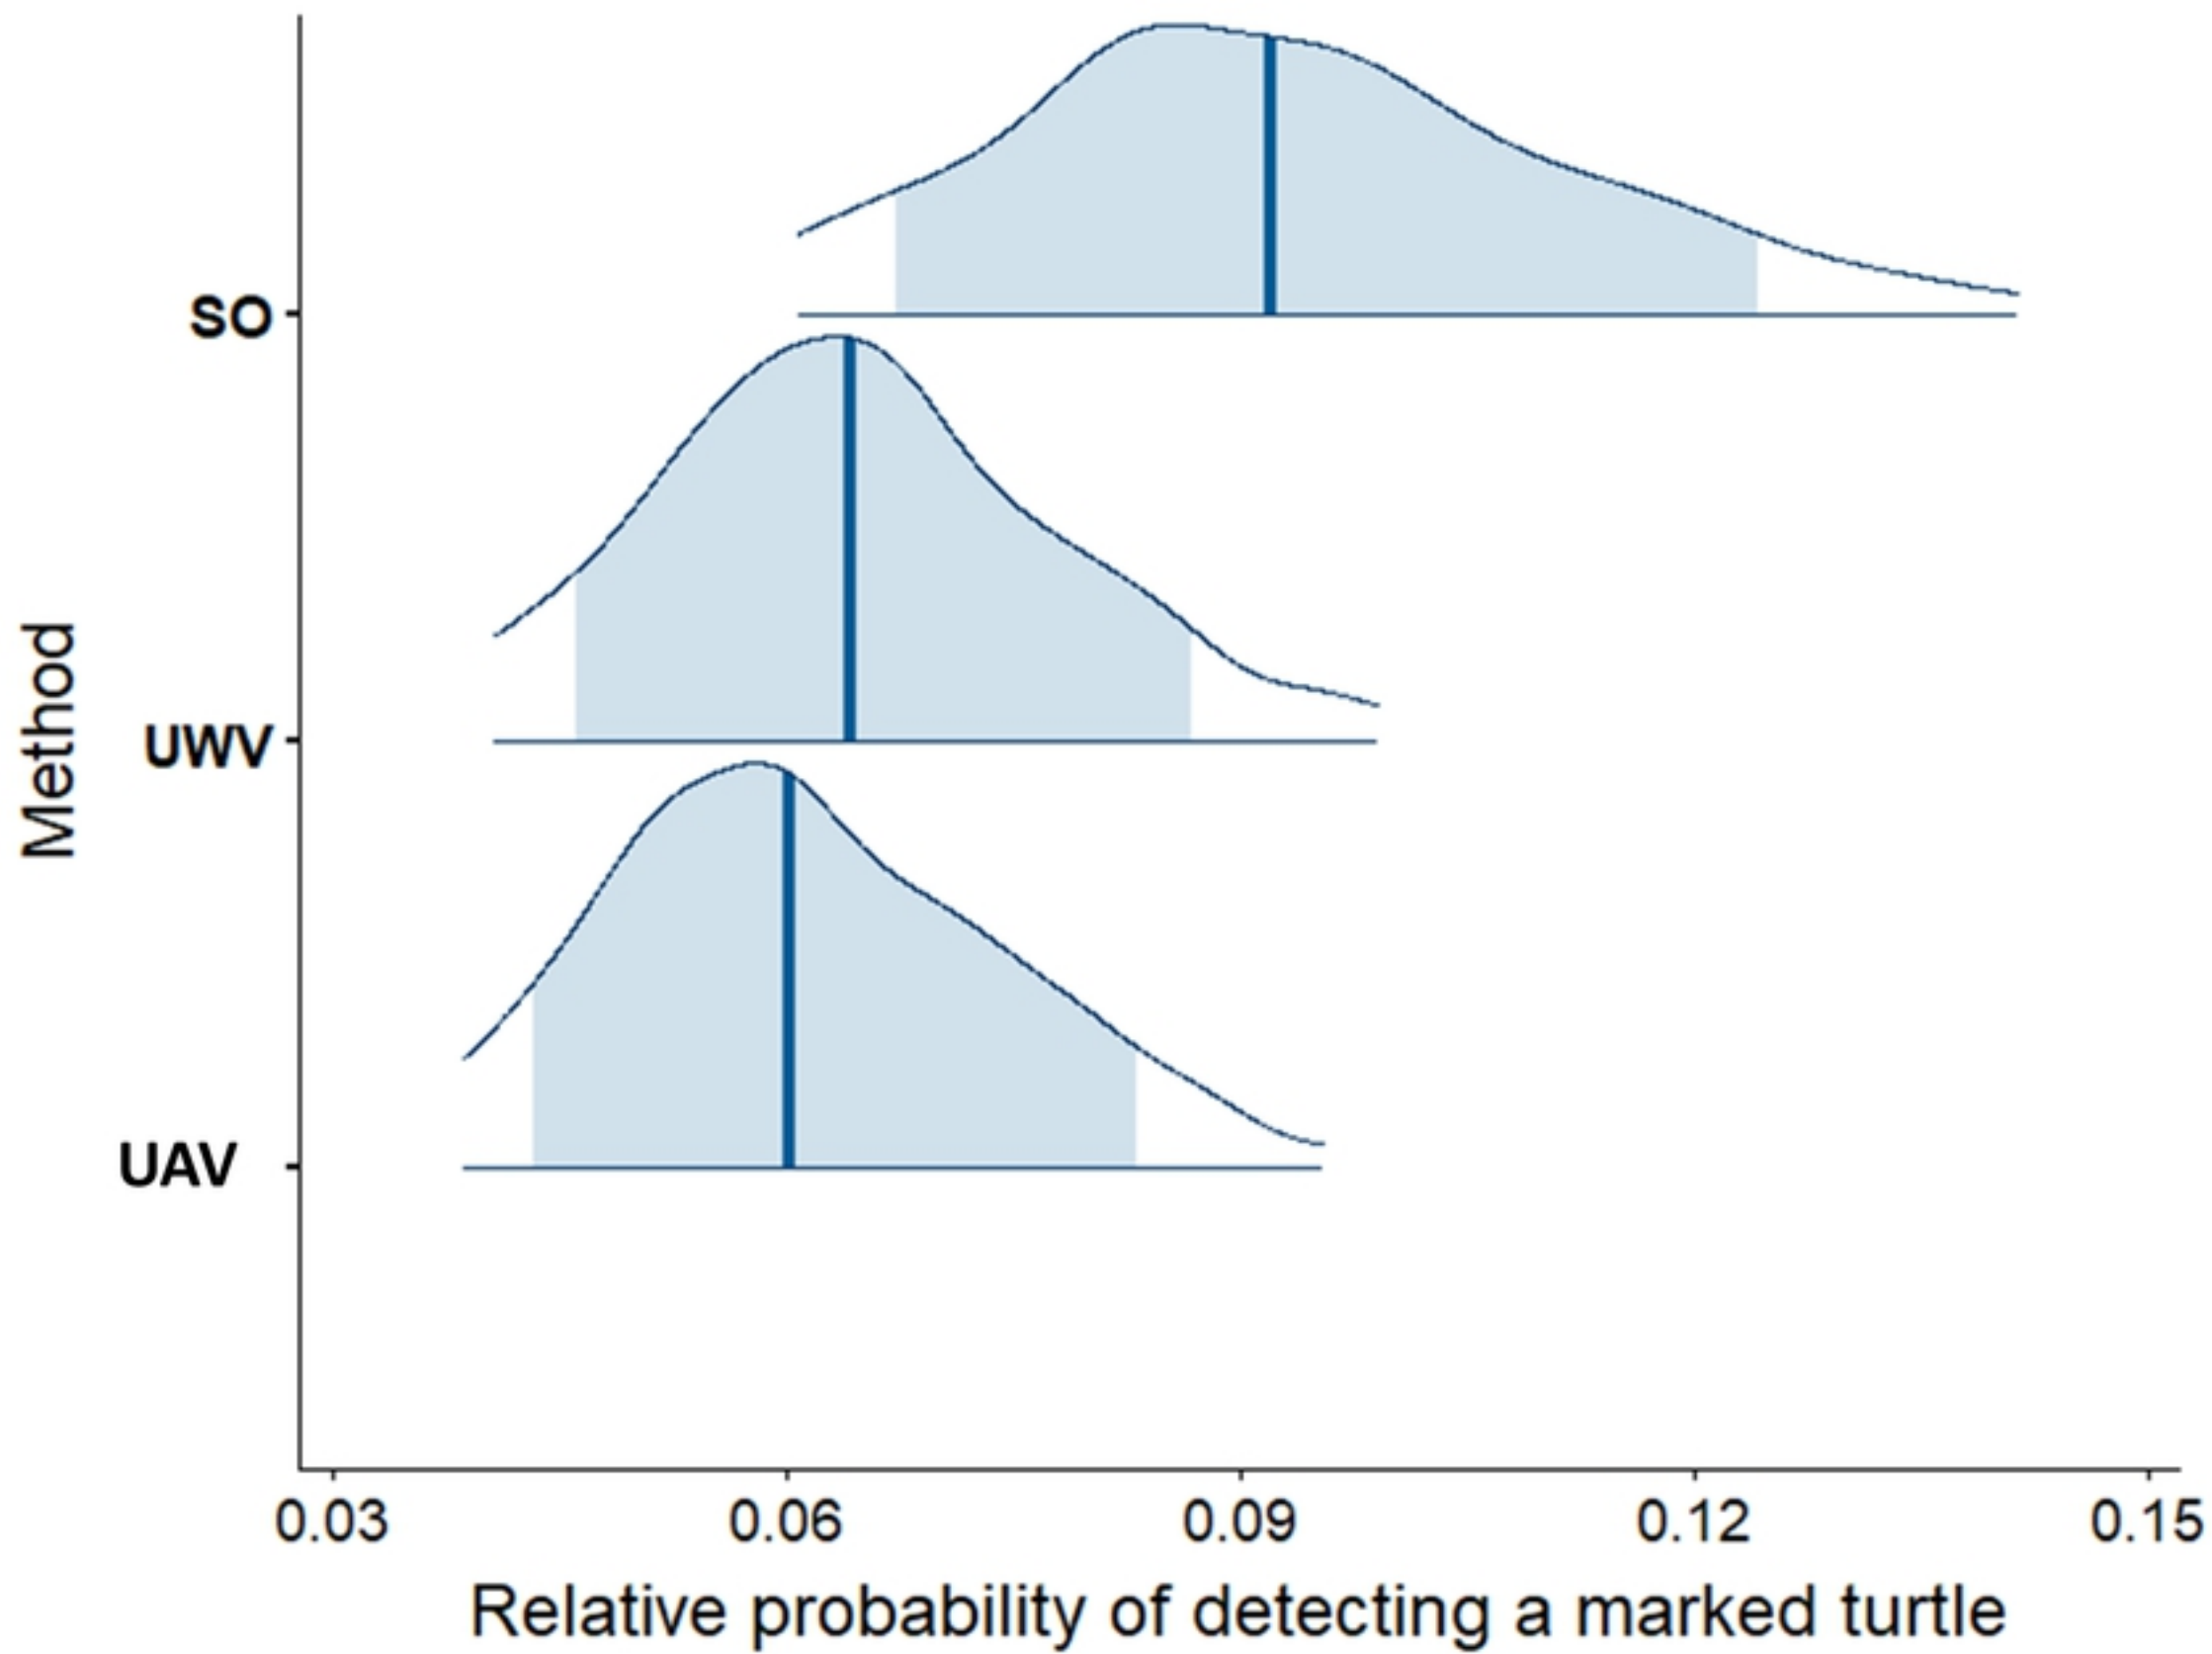

Fig5

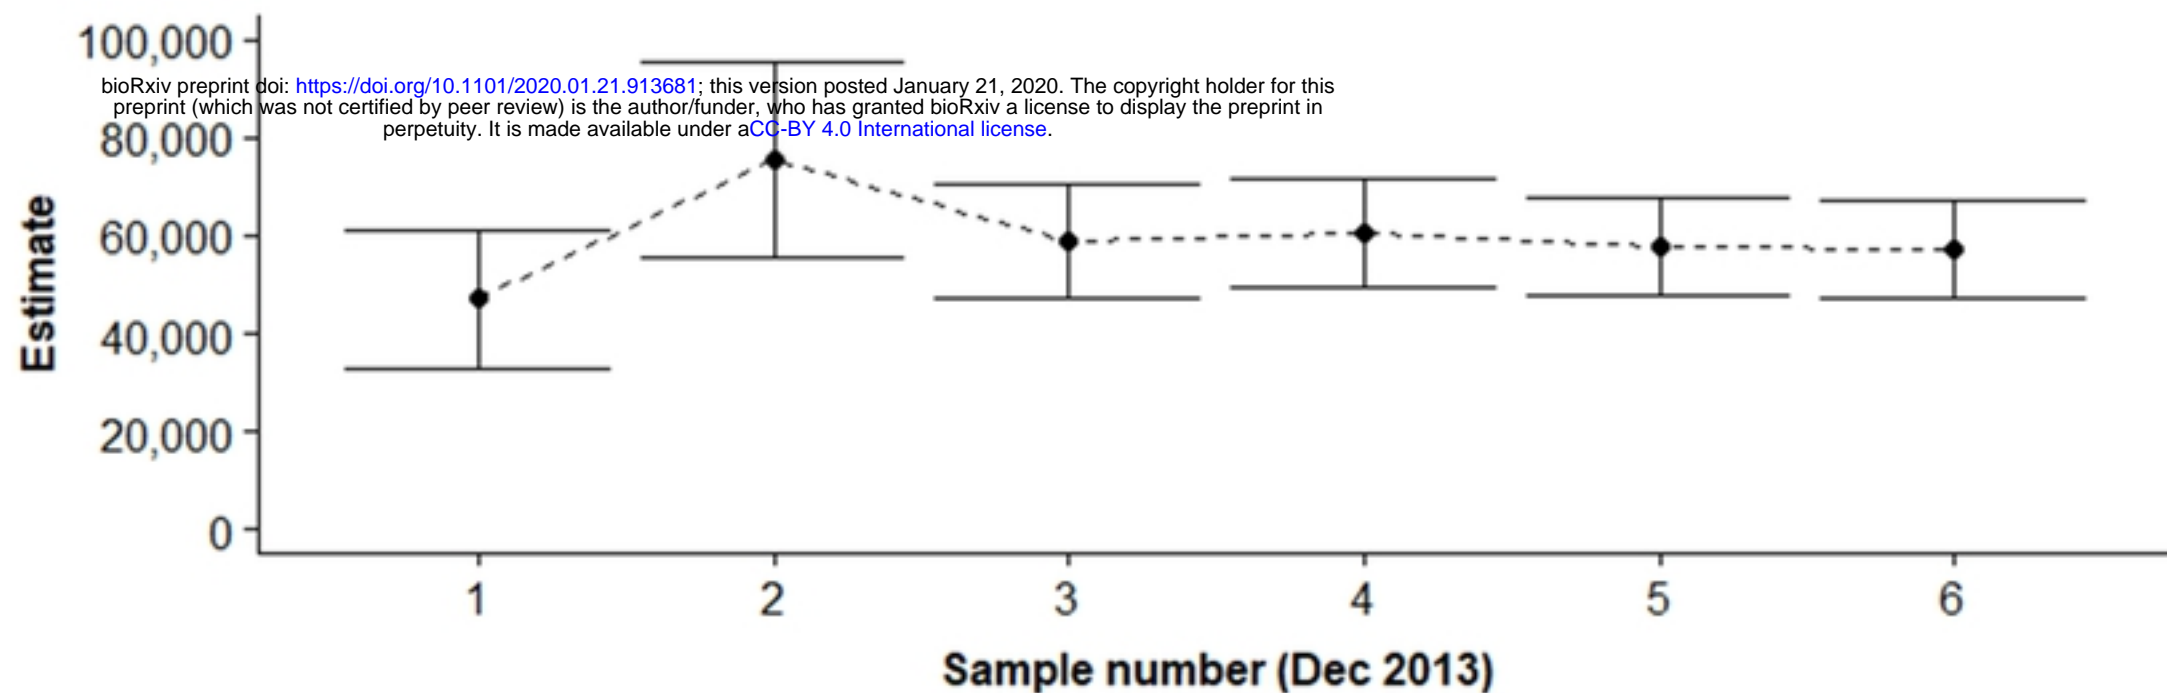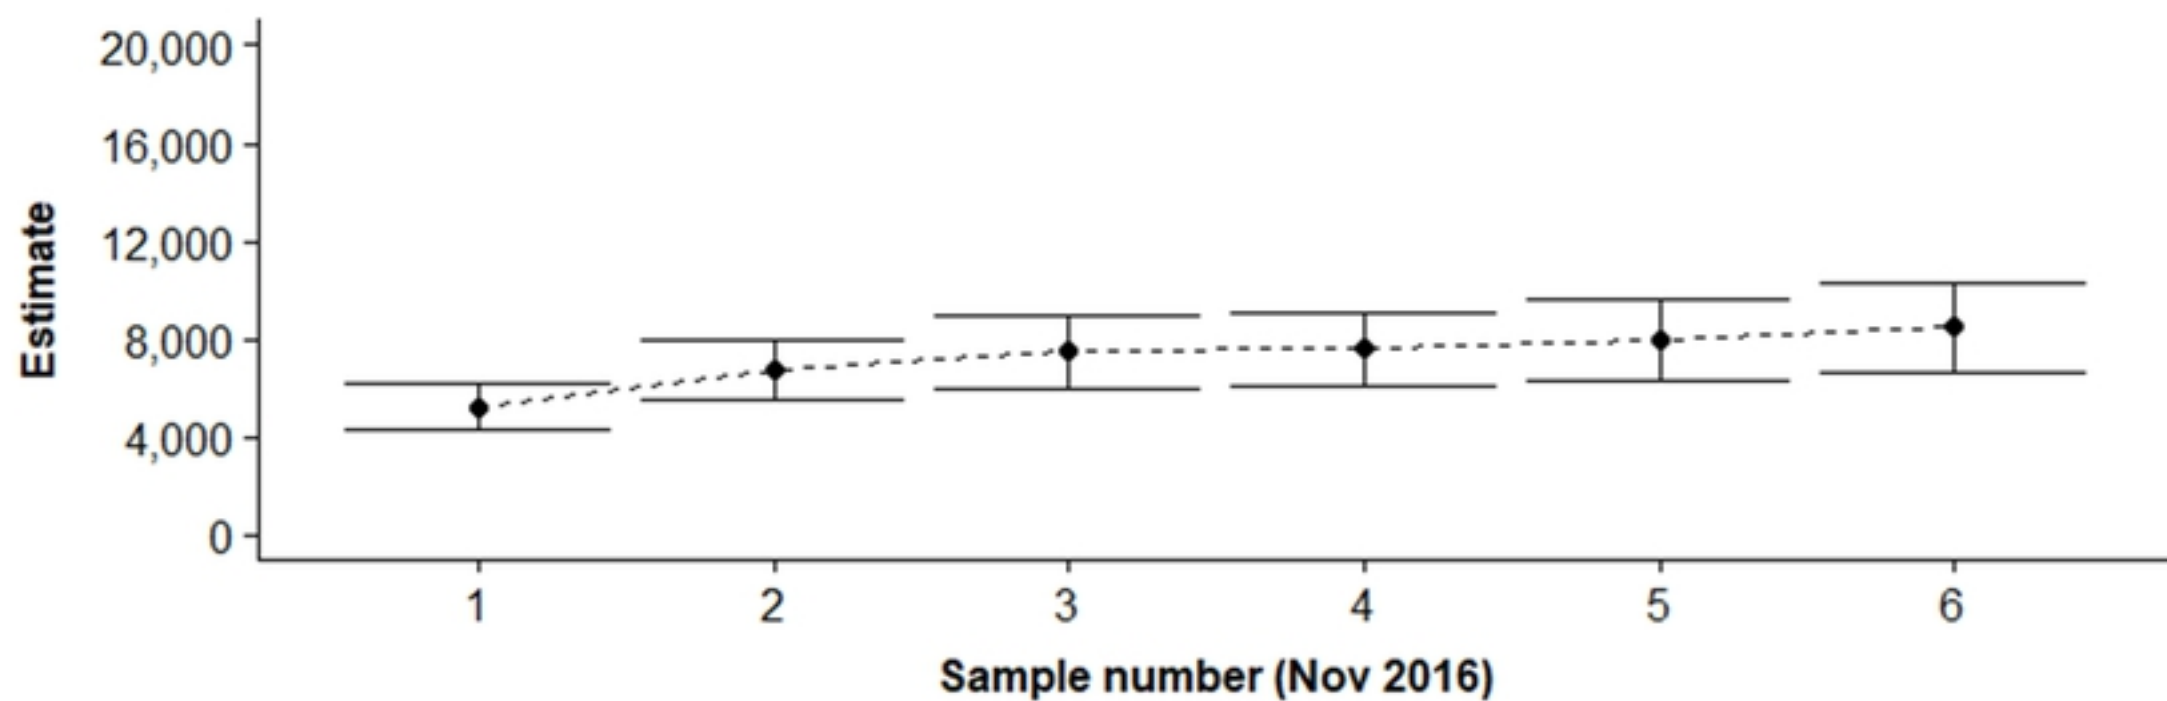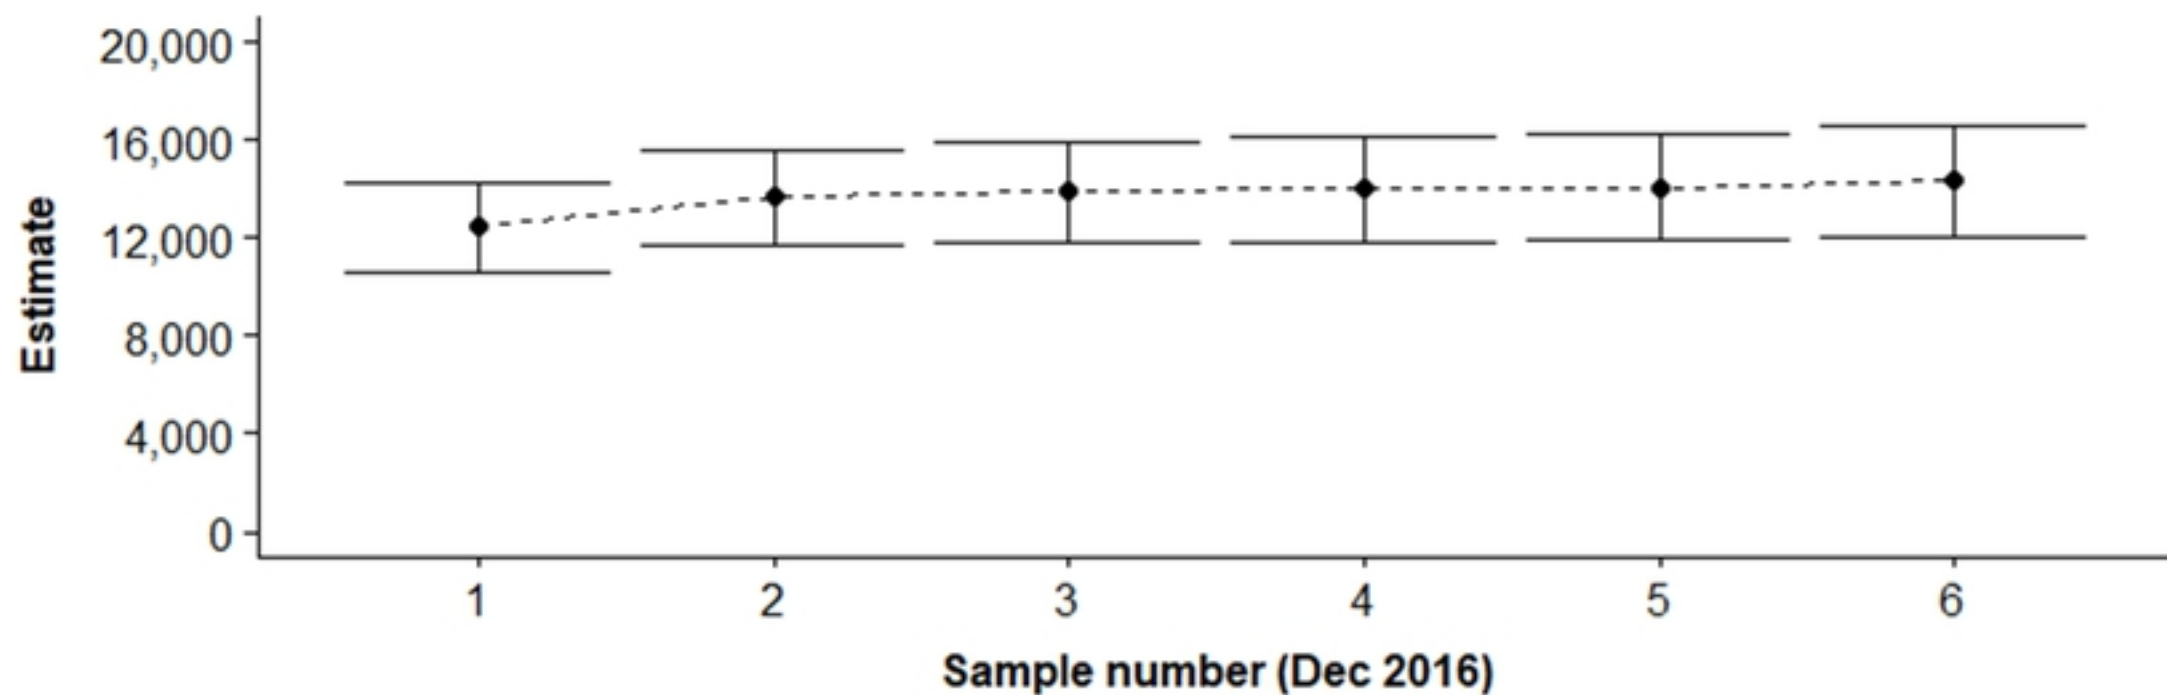

Fig6

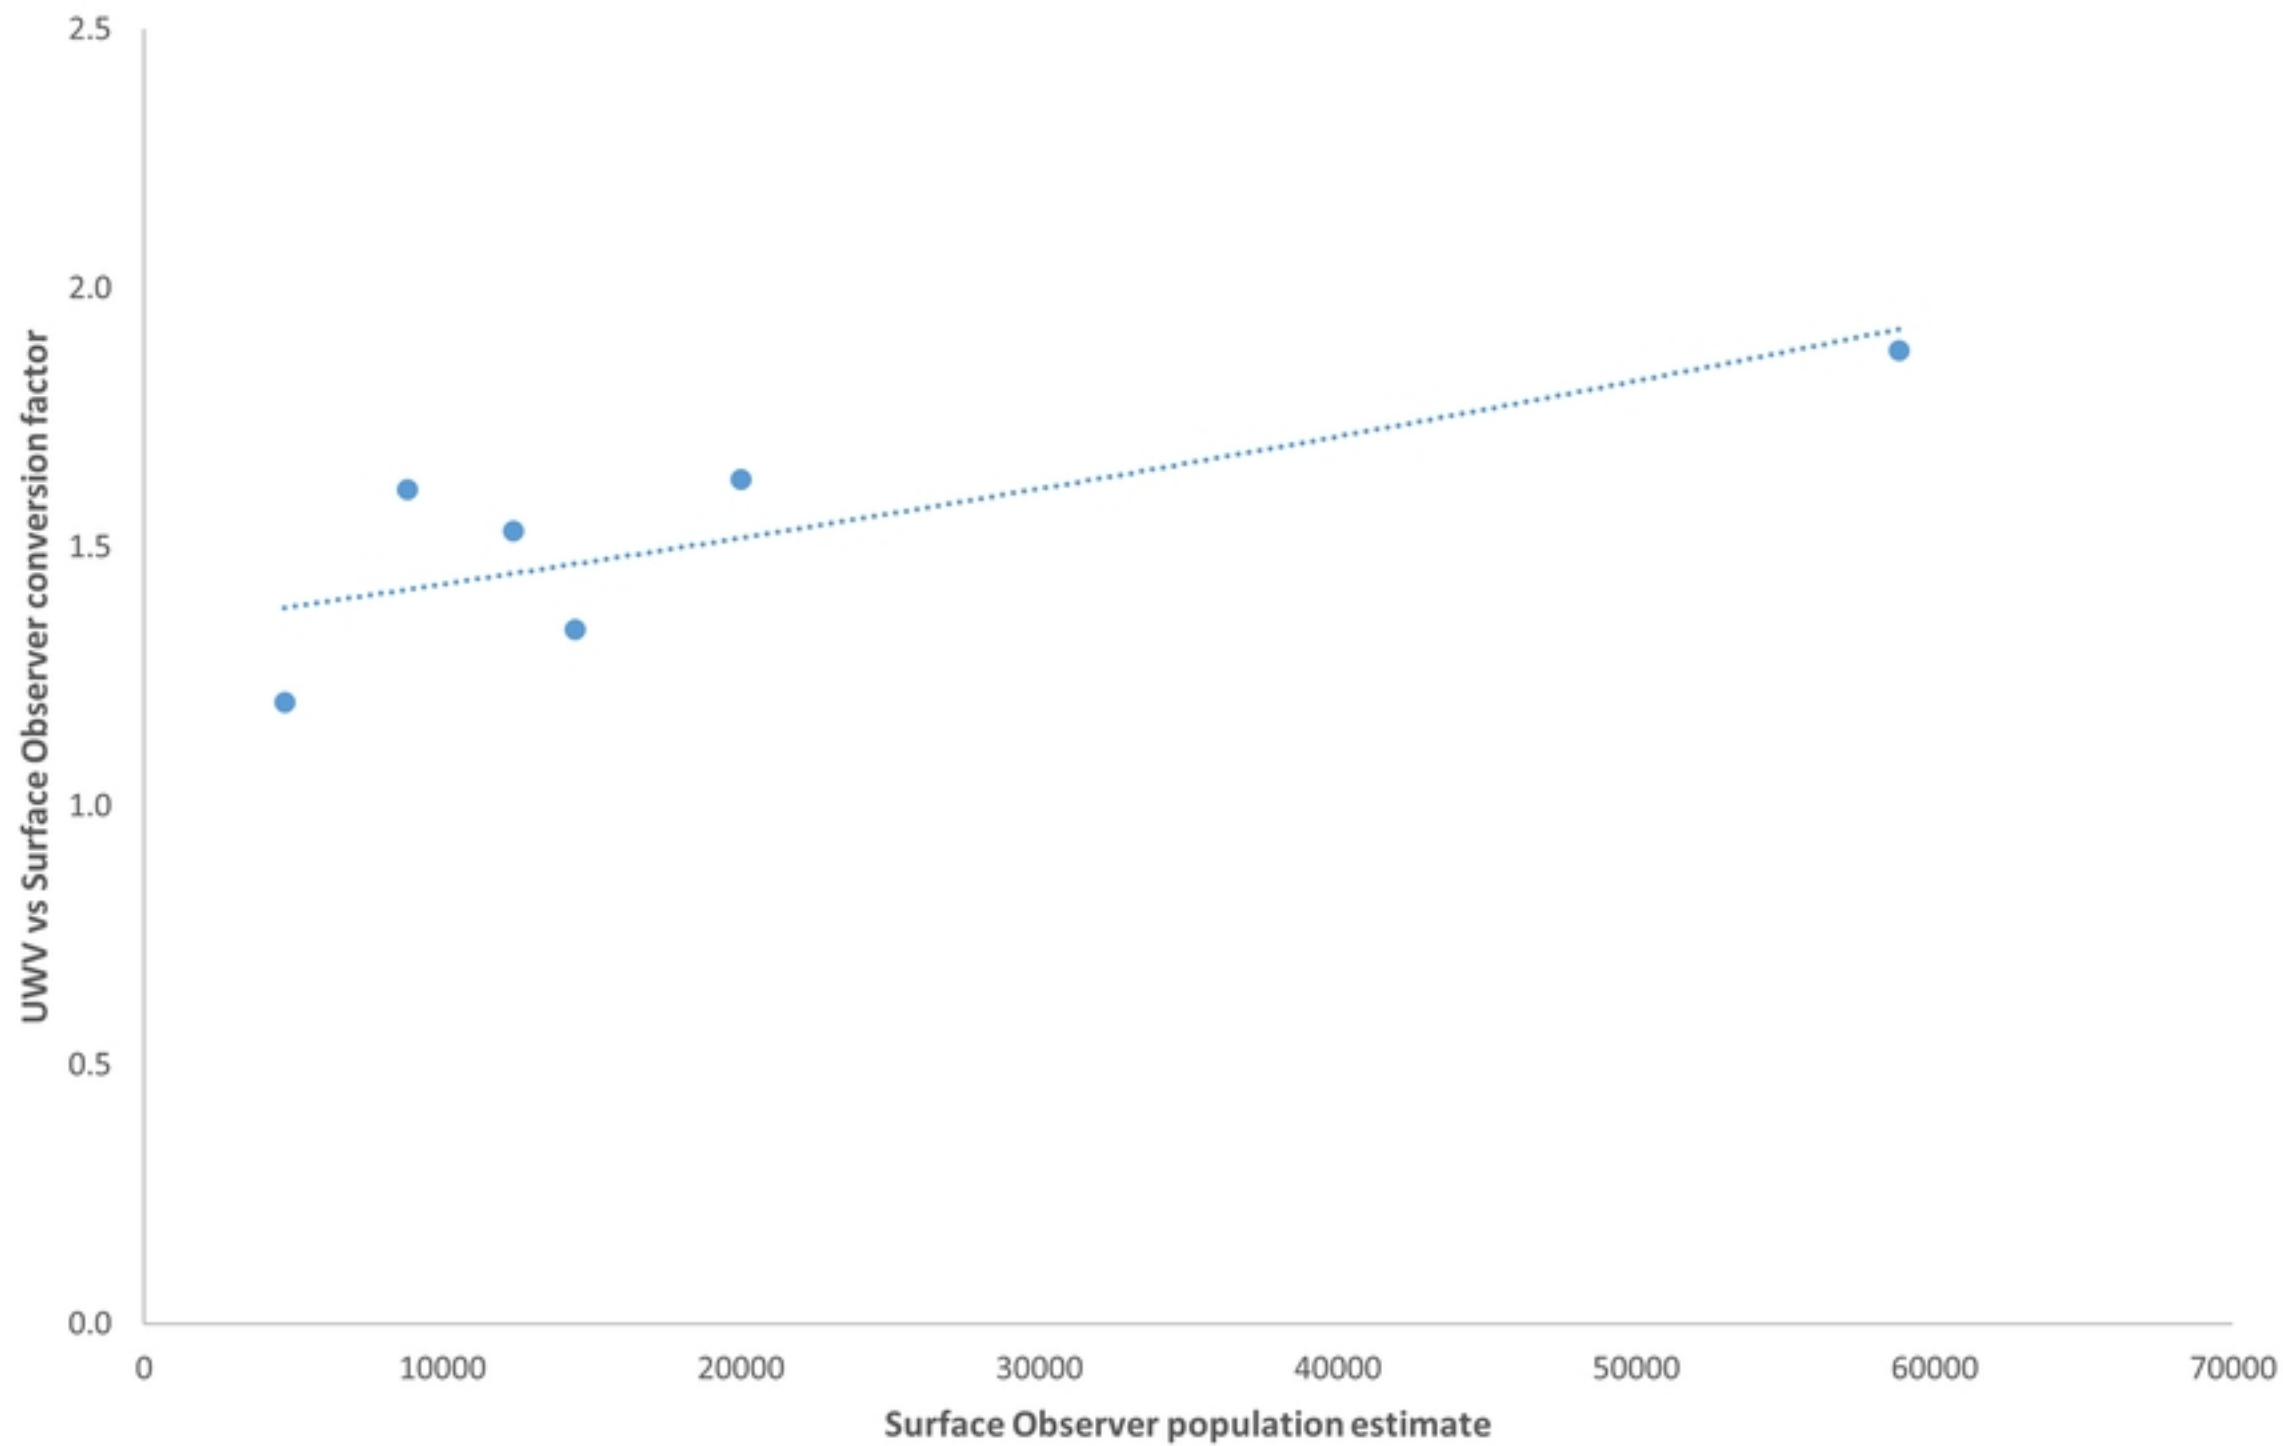

Fig7

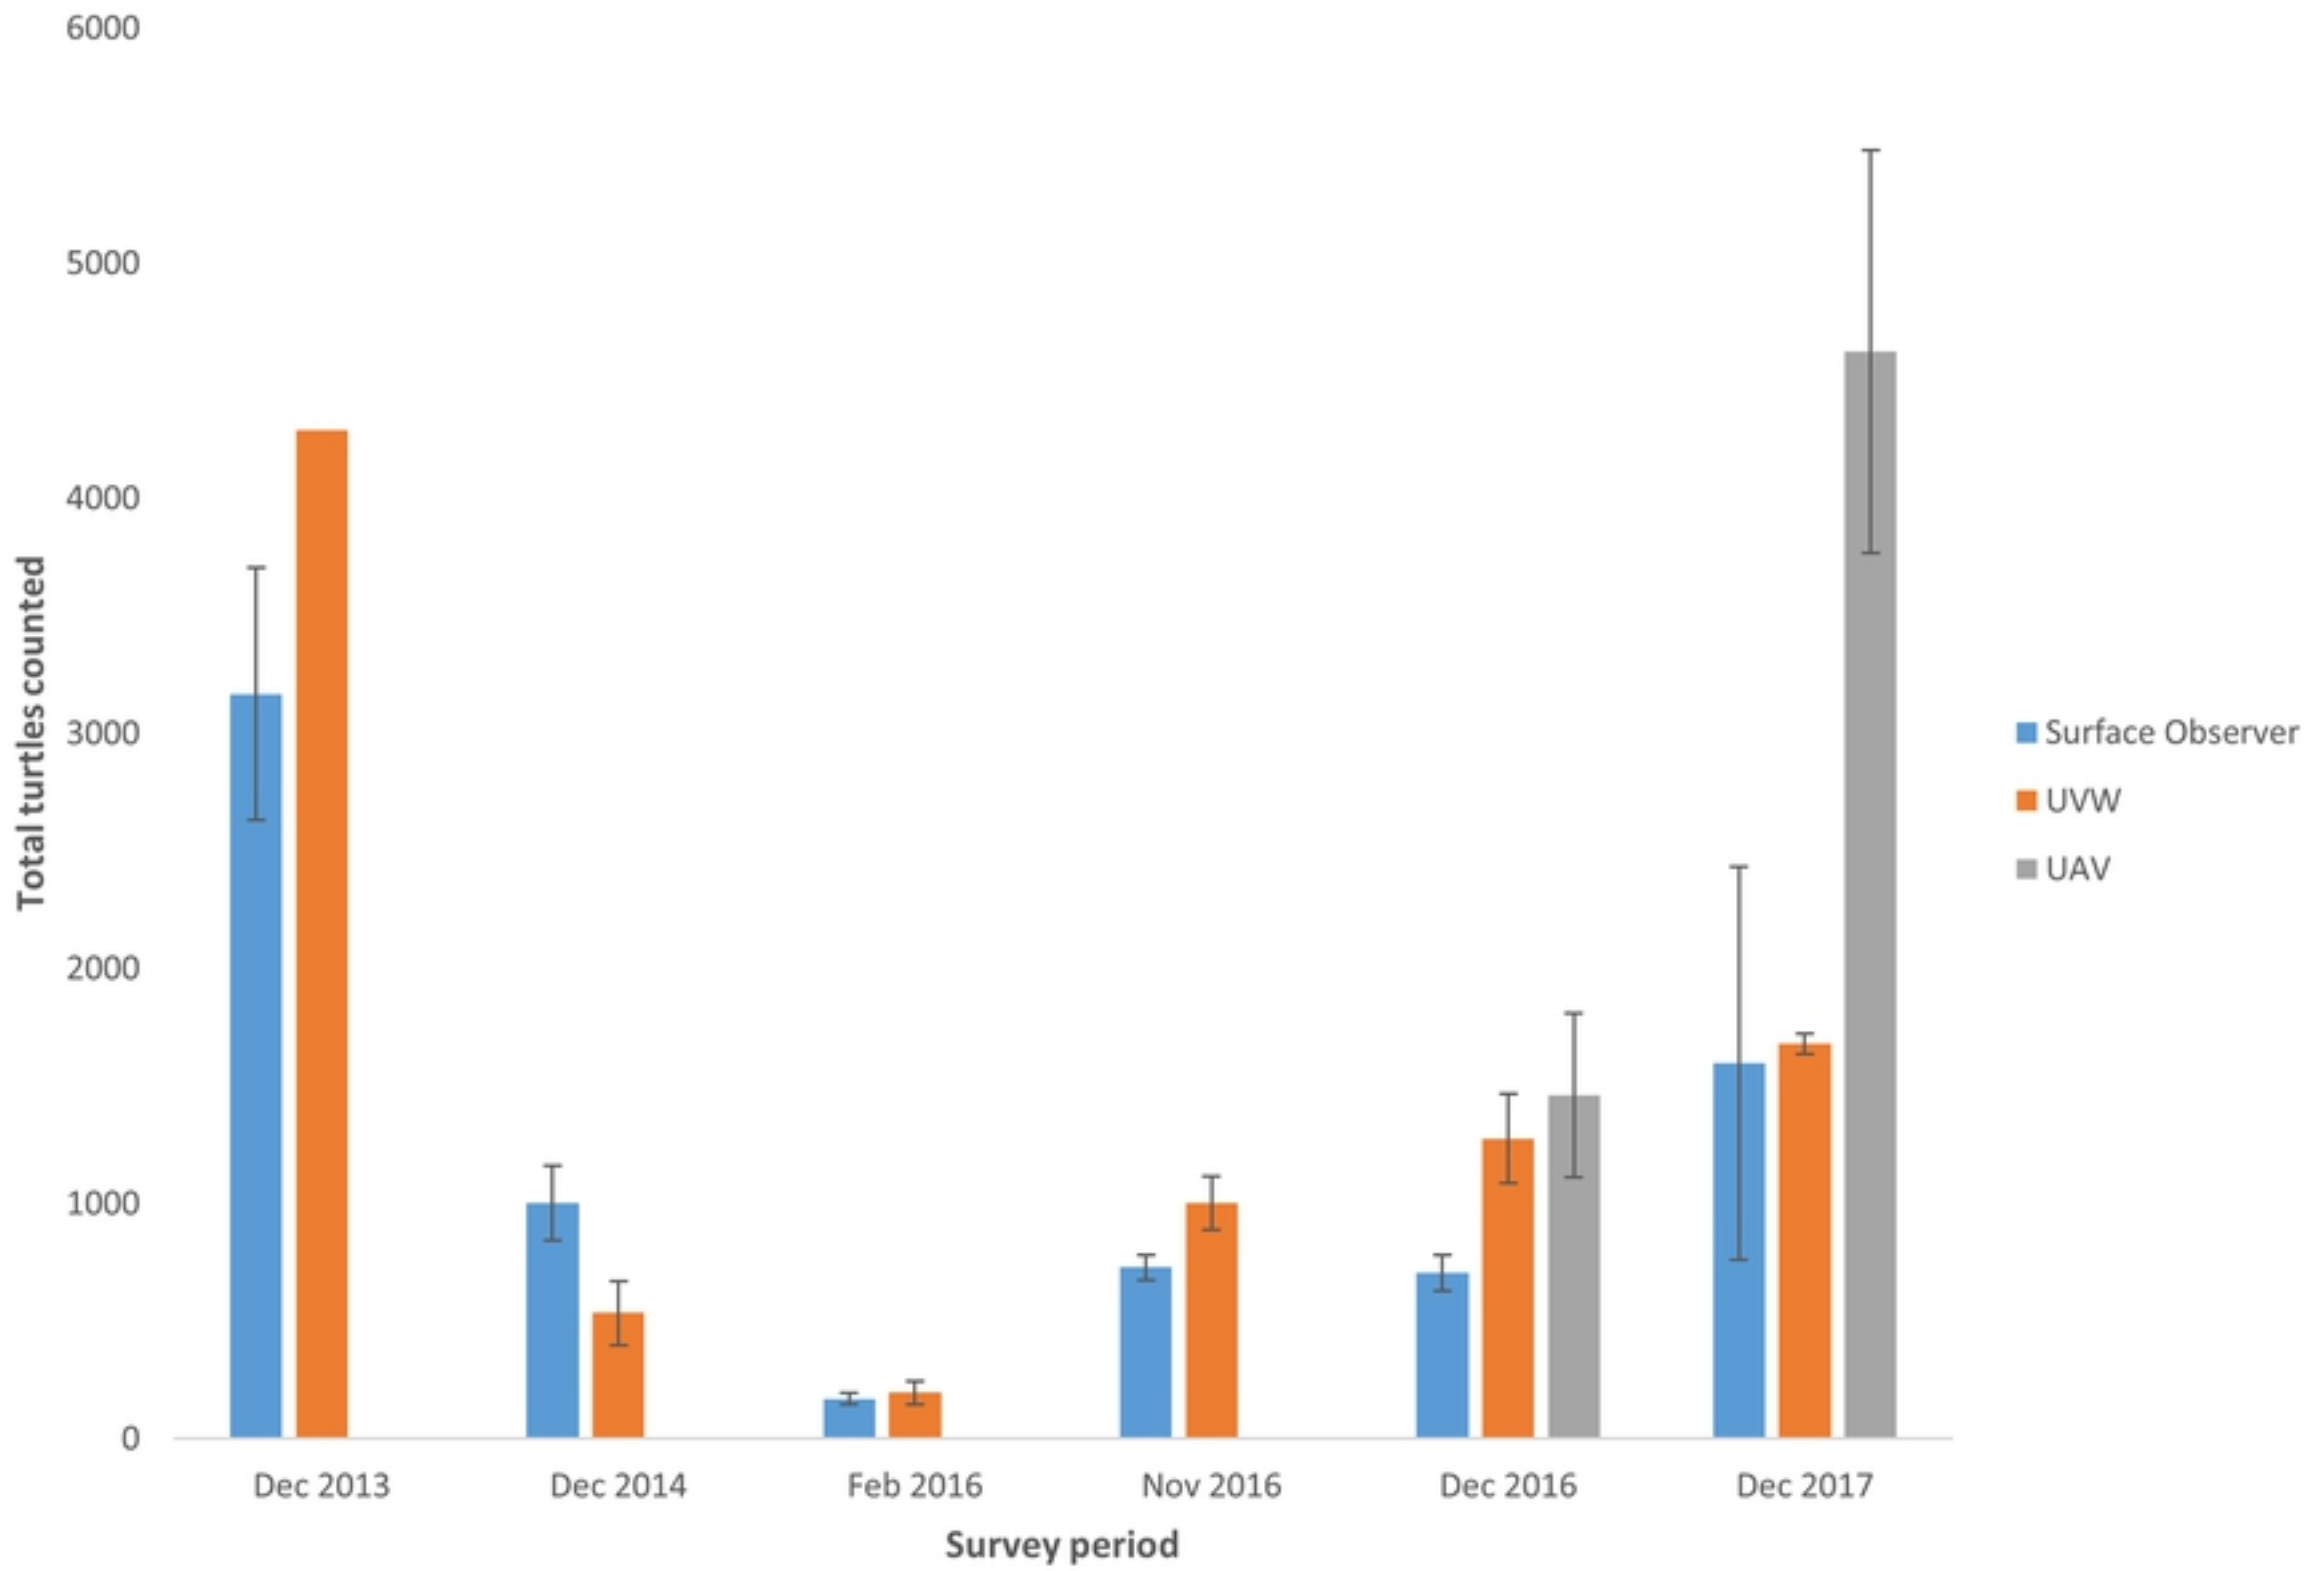

Fig8
